# Supplementary material for: The RNA receptor RIG-I binding synthetic oligodeoxynucleotide promotes pneumonia survival
Source: PubMed Central journal article supplement (PMC11601584; doi:10.1172/jci.insight.180584), 2024-11-08

**Table S1** Mouse group sizes and survival analyses by Prism

| <b>Figure 1A</b>                                                           |          |          |          |                            |                            |                            |                            |                            |
|----------------------------------------------------------------------------|----------|----------|----------|----------------------------|----------------------------|----------------------------|----------------------------|----------------------------|
| Genotype                                                                   | Wildtype | Wildtype | Wildtype | Wildtype                   | <i>Tlr9</i> <sup>-/-</sup> | <i>Tlr9</i> <sup>-/-</sup> | <i>Tlr9</i> <sup>-/-</sup> | <i>Tlr9</i> <sup>-/-</sup> |
| Treatment                                                                  | PBS      | Pam2     | ODN      | Pam2ODN                    | PBS                        | Pam2                       | ODN                        | Pam2ODN                    |
| Mouse n #                                                                  | 18       | 18       | 18       | 18                         | 18                         | 18                         | 18                         | 17                         |
| Comparison of Survival Curves                                              |          |          |          |                            | Log-rank (Mantel-Cox) test |                            |                            |                            |
| Multiple curves                                                            |          |          |          |                            | P<0.0001                   |                            |                            |                            |
| Wildtype + PBS vs. Wildtype + Pam2ODN                                      |          |          |          |                            | P<0.0001                   |                            |                            |                            |
| Wildtype + Pam2 vs. Wildtype + Pam2ODN                                     |          |          |          |                            | P<0.0001                   |                            |                            |                            |
| Wildtype + ODN vs. Wildtype + Pam2ODN                                      |          |          |          |                            | P<0.0001                   |                            |                            |                            |
| <i>Tlr9</i> <sup>-/-</sup> + PBS vs. <i>Tlr9</i> <sup>-/-</sup> + Pam2ODN  |          |          |          |                            | P<0.0001                   |                            |                            |                            |
| <i>Tlr9</i> <sup>-/-</sup> + Pam2 vs. <i>Tlr9</i> <sup>-/-</sup> + Pam2ODN |          |          |          |                            | P=0.0044                   |                            |                            |                            |
| <i>Tlr9</i> <sup>-/-</sup> + ODN vs. <i>Tlr9</i> <sup>-/-</sup> + Pam2ODN  |          |          |          |                            | P<0.0001                   |                            |                            |                            |
| <i>Tlr9</i> <sup>-/-</sup> + Pam2ODN vs. Wildtype + Pam2ODN                |          |          |          |                            | P=0.0261                   |                            |                            |                            |
| Bonferroni-corrected P value                                               |          |          |          |                            | P=0.0071                   |                            |                            |                            |
|                                                                            |          |          |          |                            |                            |                            |                            |                            |
| <b>Figure 1B</b>                                                           |          |          |          |                            |                            |                            |                            |                            |
| Genotype                                                                   | Wildtype | Wildtype | Wildtype | Wildtype                   | <i>Tlr9</i> <sup>-/-</sup> | <i>Tlr9</i> <sup>-/-</sup> | <i>Tlr9</i> <sup>-/-</sup> | <i>Tlr9</i> <sup>-/-</sup> |
| Treatment                                                                  | PBS      | Pam2     | ODN      | Pam2ODN                    | PBS                        | Pam2                       | ODN                        | Pam2ODN                    |
| Mouse n #                                                                  | 30       | 30       | 30       | 30                         | 30                         | 30                         | 30                         | 30                         |
| Comparison of Survival Curves                                              |          |          |          |                            | Log-rank (Mantel-Cox) test |                            |                            |                            |
| Multiple curves                                                            |          |          |          |                            | P<0.0001                   |                            |                            |                            |
| Wildtype + PBS vs. Wildtype + Pam2ODN                                      |          |          |          |                            | P<0.0001                   |                            |                            |                            |
| Wildtype + Pam2 vs. Wildtype + Pam2ODN                                     |          |          |          |                            | P<0.0001                   |                            |                            |                            |
| Wildtype + ODN vs. Wildtype + Pam2ODN                                      |          |          |          |                            | P<0.0001                   |                            |                            |                            |
| <i>Tlr9</i> <sup>-/-</sup> + PBS vs. <i>Tlr9</i> <sup>-/-</sup> + Pam2ODN  |          |          |          |                            | P<0.0001                   |                            |                            |                            |
| <i>Tlr9</i> <sup>-/-</sup> + Pam2 vs. <i>Tlr9</i> <sup>-/-</sup> + Pam2ODN |          |          |          |                            | P=0.0055                   |                            |                            |                            |
| <i>Tlr9</i> <sup>-/-</sup> + ODN vs. <i>Tlr9</i> <sup>-/-</sup> + Pam2ODN  |          |          |          |                            | P<0.0001                   |                            |                            |                            |
| <i>Tlr9</i> <sup>-/-</sup> + Pam2ODN vs. Wildtype + Pam2ODN                |          |          |          |                            | P=0.0163                   |                            |                            |                            |
| Bonferroni-corrected P value                                               |          |          |          |                            | P=0.0071                   |                            |                            |                            |
|                                                                            |          |          |          |                            |                            |                            |                            |                            |
| <b>Figure 3A</b>                                                           |          |          |          |                            |                            |                            |                            |                            |
| Genotype                                                                   | Wildtype | Wildtype | Wildtype | <i>Rigi</i> <sup>-/-</sup> | <i>Rigi</i> <sup>-/-</sup> | <i>Rigi</i> <sup>-/-</sup> |                            |                            |
| Treatment                                                                  | PBS      | Pam2     | Pam2ODN  | PBS                        | Pam2                       | Pam2ODN                    |                            |                            |
| Mouse n #                                                                  | 28       | 35       | 38       | 28                         | 35                         | 38                         |                            |                            |
| Comparison of Survival Curves                                              |          |          |          |                            | Log-rank (Mantel-Cox) test |                            |                            |                            |
| Multiple curves                                                            |          |          |          |                            | P<0.0001                   |                            |                            |                            |
| Wildtype + PBS vs. Wildtype + Pam2ODN                                      |          |          |          |                            | P<0.0001                   |                            |                            |                            |
| Wildtype + Pam2 vs. Wildtype + Pam2ODN                                     |          |          |          |                            | P<0.0001                   |                            |                            |                            |
| <i>Rigi</i> <sup>-/-</sup> + PBS vs. <i>Rigi</i> <sup>-/-</sup> + Pam2ODN  |          |          |          |                            | P<0.0001                   |                            |                            |                            |
| <i>Rigi</i> <sup>-/-</sup> + Pam2 vs. <i>Rigi</i> <sup>-/-</sup> + Pam2ODN |          |          |          |                            | P=0.0012                   |                            |                            |                            |
| <i>Rigi</i> <sup>-/-</sup> + Pam2ODN vs. Wildtype + Pam2ODN                |          |          |          |                            | P<0.0001                   |                            |                            |                            |

|                                                                                                         |          |          |                           |                                                    |                                                    |                                                    |  |
|---------------------------------------------------------------------------------------------------------|----------|----------|---------------------------|----------------------------------------------------|----------------------------------------------------|----------------------------------------------------|--|
| Bonferroni-corrected P value                                                                            |          |          |                           |                                                    | P=0.01                                             |                                                    |  |
| <b>Figure 3B</b>                                                                                        |          |          |                           |                                                    |                                                    |                                                    |  |
| Genotype                                                                                                | Wildtype | Wildtype | Wildtype                  | <i>Tlr9<sup>-/-</sup>;<br/>Rigi<sup>-/-</sup></i>  | <i>Tlr9<sup>-/-</sup>;<br/>Rigi<sup>-/-</sup></i>  | <i>Tlr9<sup>-/-</sup>;<br/>Rigi<sup>-/-</sup></i>  |  |
| Treatment                                                                                               | PBS      | Pam2     | Pam2ODN                   | PBS                                                | Pam2                                               | Pam2ODN                                            |  |
| Mouse n #                                                                                               | 25       | 25       | 25                        | 25                                                 | 25                                                 | 27                                                 |  |
| Comparison of Survival Curves                                                                           |          |          |                           |                                                    | Log-rank (Mantel-Cox) test                         |                                                    |  |
| Multiple curves                                                                                         |          |          |                           |                                                    | P<0.0001                                           |                                                    |  |
| Wildtype + PBS vs. Wildtype + Pam2ODN                                                                   |          |          |                           |                                                    | P<0.0001                                           |                                                    |  |
| Wildtype + Pam2 vs. Wildtype + Pam2ODN                                                                  |          |          |                           |                                                    | P<0.0001                                           |                                                    |  |
| <i>Tlr9<sup>-/-</sup> Rigi<sup>-/-</sup> + PBS vs. Tlr9<sup>-/-</sup> Rigi<sup>-/-</sup> + Pam2ODN</i>  |          |          |                           |                                                    | P<0.0001                                           |                                                    |  |
| <i>Tlr9<sup>-/-</sup> Rigi<sup>-/-</sup> + Pam2 vs. Tlr9<sup>-/-</sup> Rigi<sup>-/-</sup> + Pam2ODN</i> |          |          |                           |                                                    | P=0.0656                                           |                                                    |  |
| <i>Tlr9<sup>-/-</sup> Rigi<sup>-/-</sup> + Pam2ODN vs. Wildtype + Pam2ODN</i>                           |          |          |                           |                                                    | P<0.0001                                           |                                                    |  |
| Bonferroni-corrected P value                                                                            |          |          |                           |                                                    | P=0.01                                             |                                                    |  |
| <b>Figure 3C</b>                                                                                        |          |          |                           |                                                    |                                                    |                                                    |  |
| Genotype                                                                                                | Wildtype | Wildtype | <i>Rigi<sup>-/-</sup></i> | <i>Rigi<sup>-/-</sup></i>                          |                                                    |                                                    |  |
| Treatment                                                                                               | PBS      | Pam2ODN  | PBS                       | Pam2ODN                                            |                                                    |                                                    |  |
| Mouse n #                                                                                               | 38       | 39       | 40                        | 46                                                 |                                                    |                                                    |  |
| Comparison of Survival Curves                                                                           |          |          |                           |                                                    | Log-rank (Mantel-Cox) test                         |                                                    |  |
| Multiple curves                                                                                         |          |          |                           |                                                    | P<0.0001                                           |                                                    |  |
| Wildtype + PBS vs. Wildtype + Pam2ODN                                                                   |          |          |                           |                                                    | P<0.0001                                           |                                                    |  |
| <i>Rigi<sup>-/-</sup> + PBS vs. Rigi<sup>-/-</sup> + Pam2ODN</i>                                        |          |          |                           |                                                    | P<0.0001                                           |                                                    |  |
| <i>Rigi<sup>-/-</sup> + Pam2ODN vs. Wildtype + Pam2ODN</i>                                              |          |          |                           |                                                    | P<0.0001                                           |                                                    |  |
| Bonferroni-corrected P value                                                                            |          |          |                           |                                                    | P=0.0167                                           |                                                    |  |
| <b>Figure 5A</b>                                                                                        |          |          |                           |                                                    |                                                    |                                                    |  |
| Genotype                                                                                                | Wildtype | Wildtype | Wildtype                  | <i>Mavs<sup>-/-</sup></i>                          | <i>Mavs<sup>-/-</sup></i>                          | <i>Mavs<sup>-/-</sup></i>                          |  |
| Treatment                                                                                               | PBS      | Pam2     | Pam2ODN                   | PBS                                                | Pam2                                               | Pam2ODN                                            |  |
| Mouse n #                                                                                               | 30       | 42       | 45                        | 30                                                 | 45                                                 | 45                                                 |  |
| Comparison of Survival Curves                                                                           |          |          |                           |                                                    | Log-rank (Mantel-Cox) test                         |                                                    |  |
| Multiple curves                                                                                         |          |          |                           |                                                    | P<0.0001                                           |                                                    |  |
| Wildtype + PBS vs. Wildtype + Pam2ODN                                                                   |          |          |                           |                                                    | P<0.0001                                           |                                                    |  |
| Wildtype + Pam2 vs. Wildtype + Pam2ODN                                                                  |          |          |                           |                                                    | P<0.0001                                           |                                                    |  |
| <i>Mavs<sup>-/-</sup> + PBS vs. Mavs<sup>-/-</sup> + Pam2ODN</i>                                        |          |          |                           |                                                    | P<0.0001                                           |                                                    |  |
| <i>Mavs<sup>-/-</sup> + Pam2 vs. Mavs<sup>-/-</sup> + Pam2ODN</i>                                       |          |          |                           |                                                    | P=0.0018                                           |                                                    |  |
| <i>Mavs<sup>-/-</sup> + Pam2ODN vs. Wildtype + Pam2ODN</i>                                              |          |          |                           |                                                    | P=0.0009                                           |                                                    |  |
| Bonferroni-corrected P value                                                                            |          |          |                           |                                                    | P=0.01                                             |                                                    |  |
| <b>Figure 5B</b>                                                                                        |          |          |                           |                                                    |                                                    |                                                    |  |
| Genotype                                                                                                | Wildtype | Wildtype | Wildtype                  | <i>Tlr9<sup>-/-</sup>;<br/>;Mavs<sup>-/-</sup></i> | <i>Tlr9<sup>-/-</sup>;<br/>;Mavs<sup>-/-</sup></i> | <i>Tlr9<sup>-/-</sup>;<br/>;Mavs<sup>-/-</sup></i> |  |

|                                                                            |          |          |                             |                             |                            |         |  |  |
|----------------------------------------------------------------------------|----------|----------|-----------------------------|-----------------------------|----------------------------|---------|--|--|
| Treatment                                                                  | PBS      | Pam2     | Pam2ODN                     | PBS                         | Pam2                       | Pam2ODN |  |  |
| Mouse n #                                                                  | 35       | 35       | 35                          | 35                          | 35                         | 35      |  |  |
| Comparison of Survival Curves                                              |          |          |                             |                             | Log-rank (Mantel-Cox) test |         |  |  |
| Multiple curves                                                            |          |          |                             |                             | P<0.0001                   |         |  |  |
| Wildtype + PBS vs. Wildtype + Pam2ODN                                      |          |          |                             |                             | P<0.0001                   |         |  |  |
| Wildtype + Pam2 vs. Wildtype + Pam2ODN                                     |          |          |                             |                             | P<0.0001                   |         |  |  |
| <i>Tlr9</i> <sup>-/-</sup> + PBS vs. <i>Tlr9</i> <sup>-/-</sup> + Pam2ODN  |          |          |                             |                             | P<0.0001                   |         |  |  |
| <i>Tlr9</i> <sup>-/-</sup> + Pam2 vs. <i>Tlr9</i> <sup>-/-</sup> + Pam2ODN |          |          |                             |                             | P=0.2476                   |         |  |  |
| <i>Tlr9</i> <sup>-/-</sup> + Pam2ODN vs. Wildtype + Pam2ODN                |          |          |                             |                             | P<0.0001                   |         |  |  |
| Bonferroni-corrected P value                                               |          |          |                             |                             | P=0.01                     |         |  |  |
| <b>Figure 5C</b>                                                           |          |          |                             |                             |                            |         |  |  |
| Genotype                                                                   | Wildtype | Wildtype | <i>Mavs</i> <sup>-/-</sup>  | <i>Mavs</i> <sup>-/-</sup>  |                            |         |  |  |
| Treatment                                                                  | PBS      | Pam2ODN  | PBS                         | Pam2ODN                     |                            |         |  |  |
| Mouse n #                                                                  | 31       | 32       | 37                          | 38                          |                            |         |  |  |
| Comparison of Survival Curves                                              |          |          |                             |                             | Log-rank (Mantel-Cox) test |         |  |  |
| Multiple curves                                                            |          |          |                             |                             | P<0.0001                   |         |  |  |
| Wildtype + PBS vs. Wildtype + Pam2ODN                                      |          |          |                             |                             | P<0.0001                   |         |  |  |
| <i>Mavs</i> <sup>-/-</sup> + PBS vs. <i>Mavs</i> <sup>-/-</sup> + Pam2ODN  |          |          |                             |                             | P<0.0001                   |         |  |  |
| <i>Mavs</i> <sup>-/-</sup> + Pam2ODN vs. Wildtype + Pam2ODN                |          |          |                             |                             | P<0.0001                   |         |  |  |
| Bonferroni-corrected P value                                               |          |          |                             |                             | P=0.0167                   |         |  |  |
| <b>Figure 6A</b>                                                           |          |          |                             |                             |                            |         |  |  |
| Genotype                                                                   | Wildtype | Wildtype | <i>Tlr9</i> <sup>-/-</sup>  | <i>Tlr9</i> <sup>-/-</sup>  |                            |         |  |  |
| Treatment                                                                  | PBS      | ODN      | PBS                         | ODN                         |                            |         |  |  |
| Mouse n #                                                                  | 8        | 8        | 25                          | 25                          |                            |         |  |  |
| Comparison of Survival Curves                                              |          |          |                             |                             | Log-rank (Mantel-Cox) test |         |  |  |
| Multiple curves                                                            |          |          |                             |                             | P=0.0003                   |         |  |  |
| <i>Tlr9</i> <sup>-/-</sup> + PBS vs. <i>Tlr9</i> <sup>-/-</sup> + ODN      |          |          |                             |                             | P<0.0001                   |         |  |  |
| <i>Tlr9</i> <sup>-/-</sup> + PBS vs. Wildtype + PBS                        |          |          |                             |                             | P=0.0142                   |         |  |  |
| Bonferroni-corrected P value                                               |          |          |                             |                             | P=0.0167                   |         |  |  |
| <b>Figure 6B</b>                                                           |          |          |                             |                             |                            |         |  |  |
| Genotype                                                                   | Wildtype | Wildtype | <i>Rig-i</i> <sup>-/-</sup> | <i>Rig-i</i> <sup>-/-</sup> |                            |         |  |  |
| Treatment                                                                  | PBS      | ODN      | PBS                         | ODN                         |                            |         |  |  |
| Mouse n #                                                                  | 15       | 15       | 15                          | 15                          |                            |         |  |  |
| Comparison of Survival Curves                                              |          |          |                             |                             | Log-rank (Mantel-Cox) test |         |  |  |
| Multiple curves                                                            |          |          |                             |                             | P=0.0004                   |         |  |  |
| <i>Rig-i</i> <sup>-/-</sup> + PBS vs. <i>Rig-i</i> <sup>-/-</sup> + ODN    |          |          |                             |                             | P=0.0330                   |         |  |  |
| <i>Rig-i</i> <sup>-/-</sup> + PBS vs. Wildtype + PBS                       |          |          |                             |                             | P=0.0063                   |         |  |  |
| Bonferroni-corrected P value                                               |          |          |                             |                             | P=0.025                    |         |  |  |
| <b>Figure 6C</b>                                                           |          |          |                             |                             |                            |         |  |  |

|                                                                                                                               |          |          |                                                             |                                                             |                            |  |  |  |
|-------------------------------------------------------------------------------------------------------------------------------|----------|----------|-------------------------------------------------------------|-------------------------------------------------------------|----------------------------|--|--|--|
| Genotype                                                                                                                      | Wildtype | Wildtype | <i>Mavs</i> <sup>-/-</sup>                                  | <i>Mavs</i> <sup>-/-</sup>                                  |                            |  |  |  |
| Treatment                                                                                                                     | PBS      | ODN      | PBS                                                         | ODN                                                         |                            |  |  |  |
| Mouse n #                                                                                                                     | 16       | 16       | 49                                                          | 51                                                          |                            |  |  |  |
| Comparison of Survival Curves                                                                                                 |          |          |                                                             |                                                             | Log-rank (Mantel-Cox) test |  |  |  |
| Multiple curves                                                                                                               |          |          |                                                             |                                                             | P<0.0001                   |  |  |  |
| <i>Mavs</i> <sup>-/-</sup> + PBS vs. <i>Mavs</i> <sup>-/-</sup> + ODN                                                         |          |          |                                                             |                                                             | P<0.0001                   |  |  |  |
| <i>Mavs</i> <sup>-/-</sup> + PBS vs. Wildtype + PBS                                                                           |          |          |                                                             |                                                             | P=0.0094                   |  |  |  |
| Bonferroni-corrected P value                                                                                                  |          |          |                                                             |                                                             | P=0.025                    |  |  |  |
| <b>Figure 6D</b>                                                                                                              |          |          |                                                             |                                                             |                            |  |  |  |
| Genotype                                                                                                                      | Wildtype | Wildtype | <i>Tlr9</i> <sup>-/-</sup><br>; <i>Mavs</i> <sup>-/-</sup>  | <i>Tlr9</i> <sup>-/-</sup><br>; <i>Mavs</i> <sup>-/-</sup>  |                            |  |  |  |
| Treatment                                                                                                                     | PBS      | ODN      | PBS                                                         | ODN                                                         |                            |  |  |  |
| Mouse n #                                                                                                                     | 9        | 9        | 27                                                          | 27                                                          |                            |  |  |  |
| Comparison of Survival Curves                                                                                                 |          |          |                                                             |                                                             | Log-rank (Mantel-Cox) test |  |  |  |
| Multiple curves                                                                                                               |          |          |                                                             |                                                             | P=0.0053                   |  |  |  |
| <i>Tlr9</i> <sup>-/-</sup> <i>Mavs</i> <sup>-/-</sup> + PBS vs. <i>Tlr9</i> <sup>-/-</sup> <i>Mavs</i> <sup>-/-</sup> + ODN   |          |          |                                                             |                                                             | P=0.94                     |  |  |  |
| <i>Tlr9</i> <sup>-/-</sup> <i>Mavs</i> <sup>-/-</sup> + PBS vs. Wildtype + PBS                                                |          |          |                                                             |                                                             | P=0.0234                   |  |  |  |
| Bonferroni-corrected P value                                                                                                  |          |          |                                                             |                                                             | P=0.025                    |  |  |  |
| <b>Figure 6E</b>                                                                                                              |          |          |                                                             |                                                             |                            |  |  |  |
| Genotype                                                                                                                      | Wildtype | Wildtype | <i>MyD88</i> <sup>-/-</sup><br>; <i>Mavs</i> <sup>-/-</sup> | <i>MyD88</i> <sup>-/-</sup><br>; <i>Mavs</i> <sup>-/-</sup> |                            |  |  |  |
| Treatment                                                                                                                     | PBS      | ODN      | PBS                                                         | ODN                                                         |                            |  |  |  |
| Mouse n #                                                                                                                     | 10       | 10       | 24                                                          | 24                                                          |                            |  |  |  |
| Comparison of Survival Curves                                                                                                 |          |          |                                                             |                                                             | Log-rank (Mantel-Cox) test |  |  |  |
| Multiple curves                                                                                                               |          |          |                                                             |                                                             | P<0.0001                   |  |  |  |
| <i>MyD88</i> <sup>-/-</sup> <i>Mavs</i> <sup>-/-</sup> + PBS vs. <i>MyD88</i> <sup>-/-</sup> <i>Mavs</i> <sup>-/-</sup> + ODN |          |          |                                                             |                                                             | P=0.3617                   |  |  |  |
| <i>MyD88</i> <sup>-/-</sup> <i>Mavs</i> <sup>-/-</sup> + PBS vs. Wildtype + PBS                                               |          |          |                                                             |                                                             | P=0.0190                   |  |  |  |
| Bonferroni-corrected P value                                                                                                  |          |          |                                                             |                                                             | P=0.025                    |  |  |  |
| <b>Figure 7A</b>                                                                                                              |          |          |                                                             |                                                             |                            |  |  |  |
| Genotype                                                                                                                      | Wildtype | Wildtype | <i>Tlr9</i> <sup>-/-</sup>                                  | <i>Tlr9</i> <sup>-/-</sup>                                  |                            |  |  |  |
| Treatment                                                                                                                     | PBS      | ODN      | PBS                                                         | ODN                                                         |                            |  |  |  |
| Mouse n #                                                                                                                     | 10       | 10       | 24                                                          | 24                                                          |                            |  |  |  |
| Comparison of Survival Curves                                                                                                 |          |          |                                                             |                                                             | Log-rank (Mantel-Cox) test |  |  |  |
| Multiple curves                                                                                                               |          |          |                                                             |                                                             | P<0.0001                   |  |  |  |
| <i>Tlr9</i> <sup>-/-</sup> + PBS vs. <i>Tlr9</i> <sup>-/-</sup> + ODN                                                         |          |          |                                                             |                                                             | P=0.0006                   |  |  |  |
| <i>Tlr9</i> <sup>-/-</sup> + PBS vs. Wildtype + PBS                                                                           |          |          |                                                             |                                                             | P=0.0042                   |  |  |  |
| Bonferroni-corrected P value                                                                                                  |          |          |                                                             |                                                             | P=0.025                    |  |  |  |
| <b>Figure 7B</b>                                                                                                              |          |          |                                                             |                                                             |                            |  |  |  |
| Genotype                                                                                                                      | Wildtype | Wildtype | <i>Rig-i</i> <sup>-/-</sup>                                 | <i>Rig-i</i> <sup>-/-</sup>                                 |                            |  |  |  |

|                                                                                                                               |          |          |                                                             |                                                             |                                                            |                                                            |                                                            |                                                            |
|-------------------------------------------------------------------------------------------------------------------------------|----------|----------|-------------------------------------------------------------|-------------------------------------------------------------|------------------------------------------------------------|------------------------------------------------------------|------------------------------------------------------------|------------------------------------------------------------|
| Treatment                                                                                                                     | PBS      | ODN      | PBS                                                         | ODN                                                         |                                                            |                                                            |                                                            |                                                            |
| Mouse n #                                                                                                                     | 18       | 18       | 21                                                          | 21                                                          |                                                            |                                                            |                                                            |                                                            |
| Comparison of Survival Curves                                                                                                 |          |          |                                                             |                                                             | Log-rank (Mantel-Cox) test                                 |                                                            |                                                            |                                                            |
| Multiple curves                                                                                                               |          |          |                                                             |                                                             | P<0.0001                                                   |                                                            |                                                            |                                                            |
| <i>Rig-i</i> <sup>-/-</sup> + PBS vs. <i>Rig-i</i> <sup>-/-</sup> + ODN                                                       |          |          |                                                             |                                                             | P=0.0046                                                   |                                                            |                                                            |                                                            |
| <i>Rig-i</i> <sup>-/-</sup> + PBS vs. Wildtype + PBS                                                                          |          |          |                                                             |                                                             | P=0.0035                                                   |                                                            |                                                            |                                                            |
| Bonferroni-corrected P value                                                                                                  |          |          |                                                             |                                                             | P=0.025                                                    |                                                            |                                                            |                                                            |
| <b>Figure 7C</b>                                                                                                              |          |          |                                                             |                                                             |                                                            |                                                            |                                                            |                                                            |
| Genotype                                                                                                                      | Wildtype | Wildtype | <i>Mavs</i> <sup>-/-</sup>                                  | <i>Mavs</i> <sup>-/-</sup>                                  |                                                            |                                                            |                                                            |                                                            |
| Treatment                                                                                                                     | PBS      | ODN      | PBS                                                         | ODN                                                         |                                                            |                                                            |                                                            |                                                            |
| Mouse n #                                                                                                                     | 20       | 20       | 40                                                          | 40                                                          |                                                            |                                                            |                                                            |                                                            |
| Comparison of Survival Curves                                                                                                 |          |          |                                                             |                                                             | Log-rank (Mantel-Cox) test                                 |                                                            |                                                            |                                                            |
| Multiple curves                                                                                                               |          |          |                                                             |                                                             | P<0.0001                                                   |                                                            |                                                            |                                                            |
| <i>Mavs</i> <sup>-/-</sup> + PBS vs. <i>Mavs</i> <sup>-/-</sup> + ODN                                                         |          |          |                                                             |                                                             | P<0.0001                                                   |                                                            |                                                            |                                                            |
| <i>Mavs</i> <sup>-/-</sup> + PBS vs. Wildtype + PBS                                                                           |          |          |                                                             |                                                             | P<0.0001                                                   |                                                            |                                                            |                                                            |
| Bonferroni-corrected P value                                                                                                  |          |          |                                                             |                                                             | P=0.025                                                    |                                                            |                                                            |                                                            |
| <b>Figure 7D</b>                                                                                                              |          |          |                                                             |                                                             |                                                            |                                                            |                                                            |                                                            |
| Genotype                                                                                                                      | Wildtype | Wildtype | <i>Tlr9</i> <sup>-/-</sup><br>; <i>Mavs</i> <sup>-/-</sup>  | <i>Tlr9</i> <sup>-/-</sup><br>; <i>Mavs</i> <sup>-/-</sup>  |                                                            |                                                            |                                                            |                                                            |
| Treatment                                                                                                                     | PBS      | ODN      | PBS                                                         | ODN                                                         |                                                            |                                                            |                                                            |                                                            |
| Mouse n #                                                                                                                     | 10       | 10       | 30                                                          | 30                                                          |                                                            |                                                            |                                                            |                                                            |
| Comparison of Survival Curves                                                                                                 |          |          |                                                             |                                                             | Log-rank (Mantel-Cox) test                                 |                                                            |                                                            |                                                            |
| Multiple curves                                                                                                               |          |          |                                                             |                                                             | P<0.0001                                                   |                                                            |                                                            |                                                            |
| <i>Tlr9</i> <sup>-/-</sup> <i>Mavs</i> <sup>-/-</sup> + PBS vs. <i>Tlr9</i> <sup>-/-</sup> <i>Mavs</i> <sup>-/-</sup> + ODN   |          |          |                                                             |                                                             | P=0.0526                                                   |                                                            |                                                            |                                                            |
| <i>Tlr9</i> <sup>-/-</sup> <i>Mavs</i> <sup>-/-</sup> + PBS vs. Wildtype + PBS                                                |          |          |                                                             |                                                             | P=0.0003                                                   |                                                            |                                                            |                                                            |
| Bonferroni-corrected P value                                                                                                  |          |          |                                                             |                                                             | P=0.025                                                    |                                                            |                                                            |                                                            |
| <b>Figure 7E</b>                                                                                                              |          |          |                                                             |                                                             |                                                            |                                                            |                                                            |                                                            |
| Genotype                                                                                                                      | Wildtype | Wildtype | <i>MyD88</i> <sup>-/-</sup><br>; <i>Mavs</i> <sup>-/-</sup> | <i>MyD88</i> <sup>-/-</sup><br>; <i>Mavs</i> <sup>-/-</sup> |                                                            |                                                            |                                                            |                                                            |
| Treatment                                                                                                                     | PBS      | ODN      | PBS                                                         | ODN                                                         |                                                            |                                                            |                                                            |                                                            |
| Mouse n #                                                                                                                     | 16       | 16       | 20                                                          | 20                                                          |                                                            |                                                            |                                                            |                                                            |
| Comparison of Survival Curves                                                                                                 |          |          |                                                             |                                                             | Log-rank (Mantel-Cox) test                                 |                                                            |                                                            |                                                            |
| Multiple curves                                                                                                               |          |          |                                                             |                                                             | P<0.0001                                                   |                                                            |                                                            |                                                            |
| <i>MyD88</i> <sup>-/-</sup> <i>Mavs</i> <sup>-/-</sup> + PBS vs. <i>MyD88</i> <sup>-/-</sup> <i>Mavs</i> <sup>-/-</sup> + ODN |          |          |                                                             |                                                             | P=0.1855                                                   |                                                            |                                                            |                                                            |
| <i>MyD88</i> <sup>-/-</sup> <i>Mavs</i> <sup>-/-</sup> + PBS vs. Wildtype + PBS                                               |          |          |                                                             |                                                             | P<0.0001                                                   |                                                            |                                                            |                                                            |
| Bonferroni-corrected P value                                                                                                  |          |          |                                                             |                                                             | P=0.025                                                    |                                                            |                                                            |                                                            |
| <b>Figure 8A</b>                                                                                                              |          |          |                                                             |                                                             |                                                            |                                                            |                                                            |                                                            |
| Genotype                                                                                                                      | Wildtype | Wildtype | Wildtype                                                    | Wildtype                                                    | <i>Tlr9</i> <sup>-/-</sup><br>; <i>Mavs</i> <sup>-/-</sup> | <i>Tlr9</i> <sup>-/-</sup><br>; <i>Mavs</i> <sup>-/-</sup> | <i>Tlr9</i> <sup>-/-</sup><br>; <i>Mavs</i> <sup>-/-</sup> | <i>Tlr9</i> <sup>-/-</sup><br>; <i>Mavs</i> <sup>-/-</sup> |

| Treatment                                                                                                                        | PBS      | Pam2     | ODN      | Pam2ODN  | PBS                                                        | Pam2                                                       | ODN                                                        | Pam2ODN                                                    |
|----------------------------------------------------------------------------------------------------------------------------------|----------|----------|----------|----------|------------------------------------------------------------|------------------------------------------------------------|------------------------------------------------------------|------------------------------------------------------------|
| Mouse n #                                                                                                                        | 10       | 10       | 10       | 10       | 10                                                         | 10                                                         | 10                                                         | 10                                                         |
| Comparison of Survival Curves                                                                                                    |          |          |          |          | Log-rank (Mantel-Cox) test                                 |                                                            |                                                            |                                                            |
| Multiple curves                                                                                                                  |          |          |          |          | P<0.0001                                                   |                                                            |                                                            |                                                            |
| Wildtype + PBS vs. Wildtype + Pam2ODN                                                                                            |          |          |          |          | P<0.0001                                                   |                                                            |                                                            |                                                            |
| Wildtype + Pam2 vs. Wildtype + Pam2ODN                                                                                           |          |          |          |          | P=0.0046                                                   |                                                            |                                                            |                                                            |
| Wildtype + ODN vs. Wildtype + Pam2ODN                                                                                            |          |          |          |          | P=0.0013                                                   |                                                            |                                                            |                                                            |
| <i>Tlr9</i> <sup>-/-</sup> <i>Mavs</i> <sup>-/-</sup> + PBS vs. <i>Tlr9</i> <sup>-/-</sup> <i>Mavs</i> <sup>-/-</sup> + Pam2ODN  |          |          |          |          | P=0.0004                                                   |                                                            |                                                            |                                                            |
| <i>Tlr9</i> <sup>-/-</sup> <i>Mavs</i> <sup>-/-</sup> + Pam2 vs. <i>Tlr9</i> <sup>-/-</sup> <i>Mavs</i> <sup>-/-</sup> + Pam2ODN |          |          |          |          | P=0.7336                                                   |                                                            |                                                            |                                                            |
| <i>Tlr9</i> <sup>-/-</sup> <i>Mavs</i> <sup>-/-</sup> + ODN vs. <i>Tlr9</i> <sup>-/-</sup> <i>Mavs</i> <sup>-/-</sup> + Pam2ODN  |          |          |          |          | P=0.3598                                                   |                                                            |                                                            |                                                            |
| <i>Tlr9</i> <sup>-/-</sup> <i>Mavs</i> <sup>-/-</sup> + Pam2ODN vs. Wildtype + Pam2ODN                                           |          |          |          |          | P=0.0040                                                   |                                                            |                                                            |                                                            |
| Bonferroni-corrected P value                                                                                                     |          |          |          |          | P=0.0071                                                   |                                                            |                                                            |                                                            |
| <b>Figure 8B</b>                                                                                                                 |          |          |          |          |                                                            |                                                            |                                                            |                                                            |
| Genotype                                                                                                                         | Wildtype | Wildtype | Wildtype | Wildtype | <i>Tlr9</i> <sup>-/-</sup><br>; <i>Mavs</i> <sup>-/-</sup> | <i>Tlr9</i> <sup>-/-</sup><br>; <i>Mavs</i> <sup>-/-</sup> | <i>Tlr9</i> <sup>-/-</sup><br>; <i>Mavs</i> <sup>-/-</sup> | <i>Tlr9</i> <sup>-/-</sup><br>; <i>Mavs</i> <sup>-/-</sup> |
| Treatment                                                                                                                        | PBS      | Pam2     | ODN      | Pam2ODN  | PBS                                                        | Pam2                                                       | ODN                                                        | Pam2ODN                                                    |
| Mouse n #                                                                                                                        | 10       | 10       | 10       | 10       | 10                                                         | 10                                                         | 10                                                         | 10                                                         |
| Comparison of Survival Curves                                                                                                    |          |          |          |          | Log-rank (Mantel-Cox) test                                 |                                                            |                                                            |                                                            |
| Multiple curves                                                                                                                  |          |          |          |          | P<0.0001                                                   |                                                            |                                                            |                                                            |
| Wildtype + PBS vs. Wildtype + Pam2ODN                                                                                            |          |          |          |          | P<0.0001                                                   |                                                            |                                                            |                                                            |
| Wildtype + Pam2 vs. Wildtype + Pam2ODN                                                                                           |          |          |          |          | P=0.0046                                                   |                                                            |                                                            |                                                            |
| Wildtype + ODN vs. Wildtype + Pam2ODN                                                                                            |          |          |          |          | P=0.0046                                                   |                                                            |                                                            |                                                            |
| <i>Tlr9</i> <sup>-/-</sup> <i>Mavs</i> <sup>-/-</sup> + PBS vs. <i>Tlr9</i> <sup>-/-</sup> <i>Mavs</i> <sup>-/-</sup> + Pam2ODN  |          |          |          |          | P=0.0133                                                   |                                                            |                                                            |                                                            |
| <i>Tlr9</i> <sup>-/-</sup> <i>Mavs</i> <sup>-/-</sup> + Pam2 vs. <i>Tlr9</i> <sup>-/-</sup> <i>Mavs</i> <sup>-/-</sup> + Pam2ODN |          |          |          |          | P=0.6560                                                   |                                                            |                                                            |                                                            |
| <i>Tlr9</i> <sup>-/-</sup> <i>Mavs</i> <sup>-/-</sup> + ODN vs. <i>Tlr9</i> <sup>-/-</sup> <i>Mavs</i> <sup>-/-</sup> + Pam2ODN  |          |          |          |          | P=0.0176                                                   |                                                            |                                                            |                                                            |
| <i>Tlr9</i> <sup>-/-</sup> <i>Mavs</i> <sup>-/-</sup> + Pam2ODN vs. Wildtype + Pam2ODN                                           |          |          |          |          | P=0.0040                                                   |                                                            |                                                            |                                                            |
| Bonferroni-corrected P value                                                                                                     |          |          |          |          | P=0.0071                                                   |                                                            |                                                            |                                                            |

| <b>Figure S1A</b>                                                         |          |          |                            |                            |
|---------------------------------------------------------------------------|----------|----------|----------------------------|----------------------------|
| Genotype                                                                  | Wildtype | Wildtype | <i>Cgas</i> <sup>-/-</sup> | <i>Cgas</i> <sup>-/-</sup> |
| Treatment                                                                 | PBS      | Pam2ODN  | PBS                        | Pam2ODN                    |
| Mouse n #                                                                 | 10       | 10       | 8                          | 9                          |
| Comparison of Survival Curves                                             |          |          | Log-rank (Mantel-Cox) test |                            |
| Multiple curves                                                           |          |          | P<0.0001                   |                            |
| Wildtype + PBS vs. Wildtype + Pam2ODN                                     |          |          | P=0.0046                   |                            |
| <i>Cgas</i> <sup>-/-</sup> + PBS vs. <i>Cgas</i> <sup>-/-</sup> + Pam2ODN |          |          | P=0.0007                   |                            |
| <i>Cgas</i> <sup>-/-</sup> + Pam2ODN vs. Wildtype + Pam2ODN               |          |          | P=0.4355                   |                            |
| Bonferroni-corrected P value                                              |          |          | P=0.0167                   |                            |
| <b>Figure S1B</b>                                                         |          |          |                            |                            |
| Genotype                                                                  | Wildtype | Wildtype | <i>Cgas</i> <sup>-/-</sup> | <i>Cgas</i> <sup>-/-</sup> |

|                                                                                 |          |          |                               |                               |
|---------------------------------------------------------------------------------|----------|----------|-------------------------------|-------------------------------|
| Treatment                                                                       | PBS      | Pam2ODN  | PBS                           | Pam2ODN                       |
| Mouse n #                                                                       | 9        | 10       | 8                             | 9                             |
| Comparison of Survival Curves                                                   |          |          | Log-rank (Mantel-Cox) test    |                               |
| Multiple curves                                                                 |          |          | P=0.0352                      |                               |
| Wildtype + PBS vs. Wildtype + Pam2ODN                                           |          |          | P=0.0413                      |                               |
| <i>Cgas</i> <sup>-/-</sup> + PBS vs. <i>Cgas</i> <sup>-/-</sup> + Pam2ODN       |          |          | P=0.0236                      |                               |
| <i>Cgas</i> <sup>-/-</sup> + Pam2ODN vs. Wildtype + Pam2ODN                     |          |          | P=0.6056                      |                               |
| Bonferroni-corrected P value                                                    |          |          | P=0.0167                      |                               |
| <b>Figure S1C</b>                                                               |          |          |                               |                               |
| Genotype                                                                        | Wildtype | Wildtype | <i>Sting</i> <sup>gt/gt</sup> | <i>Sting</i> <sup>gt/gt</sup> |
| Treatment                                                                       | PBS      | Pam2ODN  | PBS                           | Pam2ODN                       |
| Mouse n #                                                                       | 11       | 12       | 12                            | 12                            |
| Comparison of Survival Curves                                                   |          |          | Log-rank (Mantel-Cox) test    |                               |
| Multiple curves                                                                 |          |          | P=0.0009                      |                               |
| Wildtype + PBS vs. Wildtype + Pam2ODN                                           |          |          | P=0.0094                      |                               |
| <i>Sting</i> <sup>gt/gt</sup> + PBS vs. <i>Sting</i> <sup>gt/gt</sup> + Pam2ODN |          |          | P=0.0191                      |                               |
| <i>Sting</i> <sup>gt/gt</sup> + Pam2ODN vs. Wildtype + Pam2ODN                  |          |          | P=0.0701                      |                               |
| Bonferroni-corrected P value                                                    |          |          | P=0.0167                      |                               |
| <b>Figure S1D</b>                                                               |          |          |                               |                               |
| Genotype                                                                        | Wildtype | Wildtype | <i>Sting</i> <sup>gt/gt</sup> | <i>Sting</i> <sup>gt/gt</sup> |
| Treatment                                                                       | PBS      | Pam2ODN  | PBS                           | Pam2ODN                       |
| Mouse n #                                                                       | 8        | 10       | 9                             | 10                            |
| Comparison of Survival Curves                                                   |          |          | Log-rank (Mantel-Cox) test    |                               |
| Multiple curves                                                                 |          |          | P<0.0001                      |                               |
| Wildtype + PBS vs. Wildtype + Pam2ODN                                           |          |          | P<0.0001                      |                               |
| <i>Sting</i> <sup>gt/gt</sup> + PBS vs. <i>Sting</i> <sup>gt/gt</sup> + Pam2ODN |          |          | P<0.0001                      |                               |
| <i>Sting</i> <sup>gt/gt</sup> + Pam2ODN vs. Wildtype + Pam2ODN                  |          |          | P=0.9999                      |                               |
| Bonferroni-corrected P value                                                    |          |          | P=0.0167                      |                               |
| <b>Figure S1E</b>                                                               |          |          |                               |                               |
| Genotype                                                                        | Wildtype | Wildtype | <i>Ifi204</i> <sup>+/-</sup>  | <i>Ifi204</i> <sup>+/-</sup>  |
| Treatment                                                                       | PBS      | Pam2ODN  | PBS                           | Pam2ODN                       |
| Mouse n #                                                                       | 10       | 10       | 10                            | 10                            |
| Comparison of Survival Curves                                                   |          |          | Log-rank (Mantel-Cox) test    |                               |
| Multiple curves                                                                 |          |          | P=0.0007                      |                               |
| Wildtype + PBS vs. Wildtype + Pam2ODN                                           |          |          | P=0.0040                      |                               |
| <i>Ifi204</i> <sup>+/-</sup> + PBS vs. <i>Ifi204</i> <sup>+/-</sup> + Pam2ODN   |          |          | P=0.0141                      |                               |
| <i>Ifi204</i> <sup>+/-</sup> + Pam2ODN vs. Wildtype + Pam2ODN                   |          |          | P=0.1246                      |                               |
| Bonferroni-corrected P value                                                    |          |          | P=0.0167                      |                               |
| <b>Figure S7A</b>                                                               |          |          |                               |                               |
| Genotype                                                                        | Wildtype |          |                               |                               |
| Mouse n #                                                                       | 10       |          |                               |                               |
| Comparison of Survival Curves                                                   |          |          | Log-rank (Mantel-Cox) test    |                               |

|                                    |                            |                            |  |
|------------------------------------|----------------------------|----------------------------|--|
| Multiple curves                    |                            | P<0.0001                   |  |
| 1 x10 <sup>5</sup> PFU vs. 0 PFU   |                            | P<0.0001                   |  |
| 5 x10 <sup>4</sup> PFU vs. 0 PFU   |                            | P=0.0117                   |  |
| 2.5 x10 <sup>4</sup> PFU vs. 0 PFU |                            | P=0.1462                   |  |
| Bonferroni-corrected P value       |                            | P=0.0167                   |  |
|                                    |                            |                            |  |
| <b>Figure S7B</b>                  |                            |                            |  |
| Genotype                           | <i>Tlr9</i> <sup>-/-</sup> |                            |  |
| Mouse n #                          | 5                          |                            |  |
| Comparison of Survival Curves      |                            | Log-rank (Mantel-Cox) test |  |
| Multiple curves                    |                            | P<0.0001                   |  |
| 1 x10 <sup>5</sup> PFU vs. 0 PFU   |                            | P=0.0035                   |  |
| 5 x10 <sup>4</sup> PFU vs. 0 PFU   |                            | P=0.0035                   |  |
| 2.5 x10 <sup>4</sup> PFU vs. 0 PFU |                            | P=0.0126                   |  |
| Bonferroni-corrected P value       |                            | P=0.0167                   |  |
|                                    |                            |                            |  |
| <b>Figure S7C</b>                  |                            |                            |  |
| Genotype                           | <i>Mavs</i> <sup>-/-</sup> |                            |  |
| Mouse n #                          | 5                          |                            |  |
| Comparison of Survival Curves      |                            | Log-rank (Mantel-Cox) test |  |
| Multiple curves                    |                            | P<0.0001                   |  |
| 1 x10 <sup>5</sup> PFU vs. 0 PFU   |                            | P=0.0035                   |  |
| 5 x10 <sup>4</sup> PFU vs. 0 PFU   |                            | P=0.0031                   |  |
| 2.5 x10 <sup>4</sup> PFU vs. 0 PFU |                            | P=0.0026                   |  |
| Bonferroni-corrected P value       |                            | P=0.0167                   |  |



**Table S2** Protein candidates precipitated from biotinylated ODN M362 treated cells.

| Accession   | Score | Mass   | Num. of matches | Num. of significant matches | Num. of sequences | Sequence coverage | emPAI | Description                                                                    |
|-------------|-------|--------|-----------------|-----------------------------|-------------------|-------------------|-------|--------------------------------------------------------------------------------|
| MYH10_HUMAN | 466   | 228858 | 26              | 26                          | 18                | 0.07              | 0.45  | Myosin-10 OS=Homo sapiens GN=MYH10 PE=1 SV=3                                   |
| TBB6_HUMAN  | 66    | 49825  | 3               | 3                           | 2                 | 0.06              | 0.19  | Tubulin beta-6 chain OS=Homo sapiens GN=TUBB6 PE=1 SV=1                        |
| PYC_HUMAN   | 54    | 129551 | 1               | 1                           | 1                 | 0.01              | 0.03  | Pyruvate carboxylase, mitochondrial OS=Homo sapiens GN=PC PE=1 SV=2            |
| COPA_HUMAN  | 44    | 138258 | 3               | 3                           | 3                 | 0.02              | 0.1   | Coatomer subunit alpha OS=Homo sapiens GN=COPA PE=1 SV=2                       |
| FAS_HUMAN   | 42    | 273254 | 1               | 1                           | 1                 | 0                 | 0.02  | Fatty acid synthase OS=Homo sapiens GN=FASN PE=1 SV=3                          |
| MYL6_HUMAN  | 42    | 16919  | 2               | 2                           | 2                 | 0.14              | 0.67  | Myosin light polypeptide 6 OS=Homo sapiens GN=MYL6 PE=1 SV=2                   |
| ADT1_HUMAN  | 40    | 33043  | 1               | 1                           | 1                 | 0.03              | 0.14  | ADP/ATP translocase 1 OS=Homo sapiens GN=SLC25A4 PE=1 SV=4                     |
| RS16_HUMAN  | 33    | 16435  | 2               | 2                           | 2                 | 0.12              | 0.69  | 40S ribosomal protein S16 OS=Homo sapiens GN=RPS16 PE=1 SV=2                   |
| DDX58_HUMAN | 31    | 106531 | 1               | 1                           | 1                 | 0.01              | 0.04  | Probable ATP-dependent RNA helicase DDX58 OS=Homo sapiens GN=DDX58 PE=1 SV=2   |
| CENPB_HUMAN | 30    | 65132  | 2               | 2                           | 2                 | 0.03              | 0.15  | Major centromere autoantigen B OS=Homo sapiens GN=CENPB PE=1 SV=2              |
| CDKL1_HUMAN | 29    | 41645  | 1               | 1                           | 1                 | 0.02              | 0.11  | Cyclin-dependent kinase-like 1 OS=Homo sapiens GN=CDKL1 PE=1 SV=5              |
| R51A2_HUMAN | 27    | 133822 | 1               | 1                           | 1                 | 0.01              | 0.03  | RAD51-associated protein 2 OS=Homo sapiens GN=RAD51AP2 PE=1 SV=1               |
| 3BHS7_HUMAN | 26    | 40990  | 1               | 1                           | 1                 | 0.02              | 0.11  | 3 beta-hydroxysteroid dehydrogenase type 7 OS=Homo sapiens GN=HSD3B7 PE=1 SV=2 |
| GRP75_HUMAN | 26    | 73635  | 1               | 1                           | 1                 | 0.01              | 0.06  | Stress-70 protein, mitochondrial OS=Homo sapiens GN=HSPA9 PE=1 SV=2            |
| SPTN2_HUMAN | 26    | 271157 | 1               | 1                           | 1                 | 0                 | 0.02  | Spectrin beta chain, non-erythrocytic 2 OS=Homo sapiens GN=SPTBN2 PE=1 SV=3    |
| FLII_HUMAN  | 25    | 144659 | 1               | 1                           | 1                 | 0.01              | 0.03  | Protein flightless-1 homolog OS=Homo sapiens GN=FLII PE=1 SV=2                 |
| OR1E3_HUMAN | 25    | 38492  | 1               | 1                           | 1                 | 0.02              | 0.12  | Olfactory receptor 1E3 OS=Homo sapiens GN=OR1E3 PE=3 SV=2                      |

## Supplement Figure Legends

**Figure S1. Pam2-ODN treatment protects against infections in *Cgas* and *Sting* knockout mice and *Ifi204* heterozygous mice.** Survival of wild type or *Cgas*<sup>-/-</sup> mice challenged with (A) influenza A virus or (B) *P. aeruginosa* 24 h after nebulized treatment with PBS or Pam2ODN. Survival of wild type or *Sting*<sup>gt/gt</sup> mice challenged with (C) influenza A virus or (D) *P. aeruginosa* one day after nebulized treatment with PBS or Pam2ODN. Survival of wild type or *Ifi204*<sup>+/-</sup> mice challenged with (E) influenza A virus one day after nebulized treatment with PBS or Pam2ODN. \* p < 0.01 vs. PBS-treated syngeneic mice treated by log rank analysis.

**Figure S2. Identification of candidate ODN receptors.** (A) Streptavidin precipitation from lysates of HBEC3-kt cells treated as indicated were resolved by polyacrylamide gel electrophoresis and Coomassie stained. Boxes indicate bands excised for LC-MS analysis. (B) Euler diagram of LC-MS-identified proteins binding to ODN, biotinylated-ODN or both in A.

**Figure S3. Uncut blots from Figure 2.** (A) Uncut blot from Panel 4A. (B) Uncut blot from Panel 2B. (C) Uncut blots from Panel 2C, LI-COR fluorescent imaging for FITC-labeled ODN (*left*) and immunoblot for RIG-I (*right*). (D) Uncut blots from Panel 2D, LI-COR fluorescent imaging for FITC-labeled ODN (*left*) and immunoblot for RIG-I (*right*).

**Figure S4. RIG-I interaction with ODN is independent of RNA polymerase III.** (A) MLE-15 cells were pre-treated with PBS or RNA polymerase III inhibitor ML-60218 for 8 h, then 5s rRNA transcription was examined by qPCR. (B) MLE-15 cells were treated with PBS or ML-60218 for 8 h, then exposed to unlabeled ODN or 3' biotinylated-ODN for 2 h prior to streptavidin pulldown of RIG-I. (C) MLE-15 cells were exposed to unlabeled ODN or 5' or 3' biotinylated-ODN for 2 h prior to streptavidin pulldown of RIG-I. \* p < 0.0001 vs PBS-treated by two-way Student's t test.

**Figure S5. Uncut blots from Figure 4.**

**Figure S6. MAVS aggregation upon RIG-I activation by RNA ligand or ODN.** HBEC3-KT cells were treated with a known RIG-I ligand 3p-hpRNA or ODN M362 for the indicated times, then examined by MAVS immunoblotting. The smears above the predicted MAVS band indicate MAVS aggregates. GAPDH was a loading control. 3p-hpRNA, 5' triphosphate hairpin RNA.

**Figure S7. Influenza A inoculum-dependent survival of wildtype, *Mavs* or *Tlr9* knockout mice.** Wildtype mice (A), *Tlr9*<sup>-/-</sup> mice (B) or *Mavs*<sup>-/-</sup> mice (C) were challenged with inhaled influenza A virus at the indicated inocula. Shown is survival after infection.

**Figure S8. Single ligand ODN treatment-induced *Cxcl10* expression and type I interferon production in mouse lungs.** *Cxcl10* gene expression in lung homogenates from wildtype or *Tlr9*<sup>-/-</sup>; *Mavs*<sup>-/-</sup> mice (A) or *MyD88*<sup>-/-</sup>; *Mavs*<sup>-/-</sup> mice (B) 4 h after nebulized PBS or ODN treatment, measured by qPCR. Interferon α1 (C) and β (D) in lung homogenates from wildtype or *Tlr9*<sup>-/-</sup>; *Mavs*<sup>-/-</sup> mice 24 h after nebulized PBS or ODN treatment, measured by ELISA. \* p < 0.02 vs PBS-treated wildtype by one-way ANOVA (Holm-Sidak method).

**Figure S9. RIG-I/ MAVS is not involved in mitochondrial ROS pathway in lung epithelial cells.** (A) MitoSOX fluorescence in HBEC3-KT RIG-I knockdown cells or scrambled shRNA control cells, shown 100 minutes after treatment with PBS (sham) or Pam2ODN. (B) Efficacy of MAVS shRNA knock down in HBEC3-KT cells was determined by immunoblotting. (C) MitoSOX fluorescence in HBEC3-KT MAVS knockdown cells or scrambled shRNA control cells, shown

100 minutes after treatment with PBS or Pam2ODN. P values reflect intergroup analyses by one-way ANOVA (Holm-Sidak method).

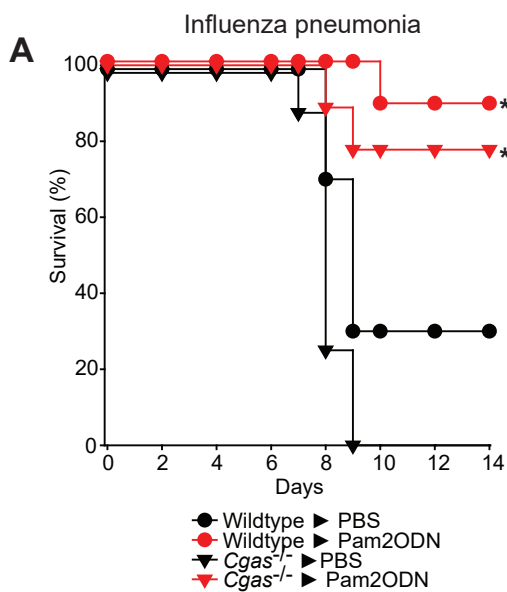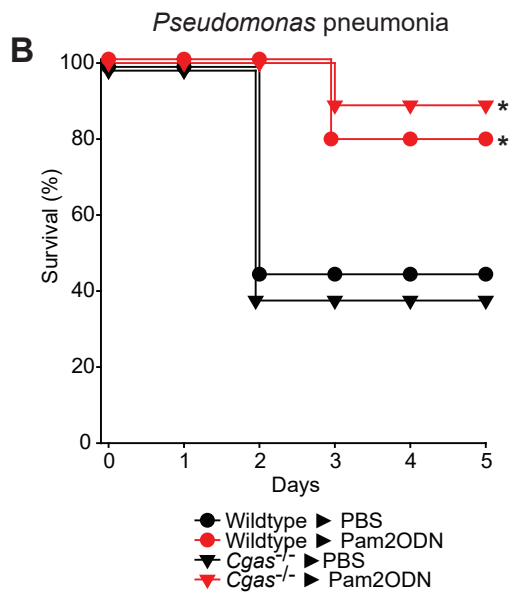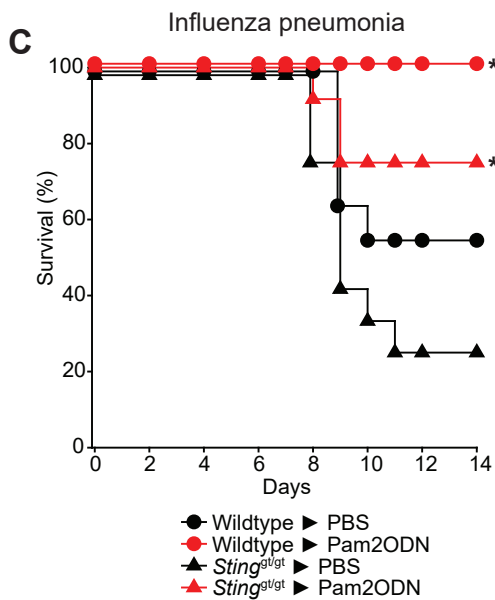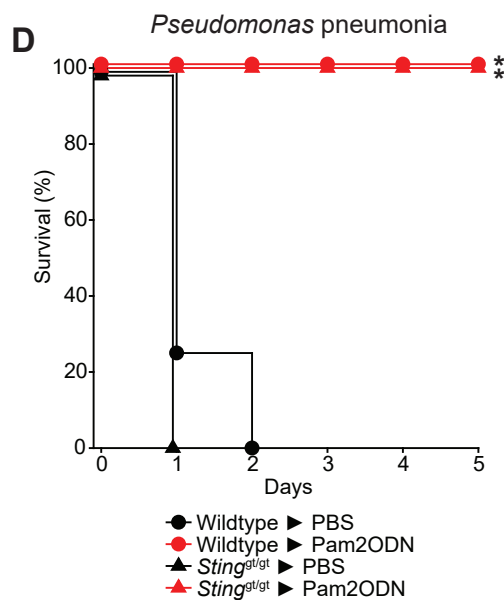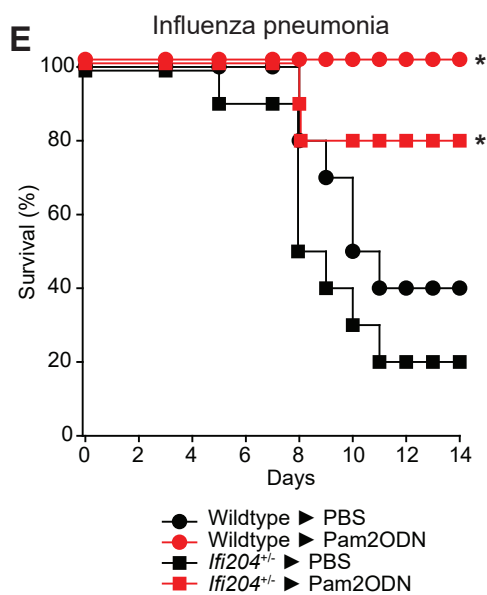

A

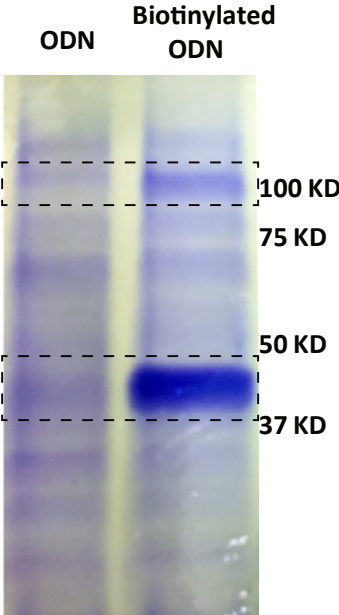

B

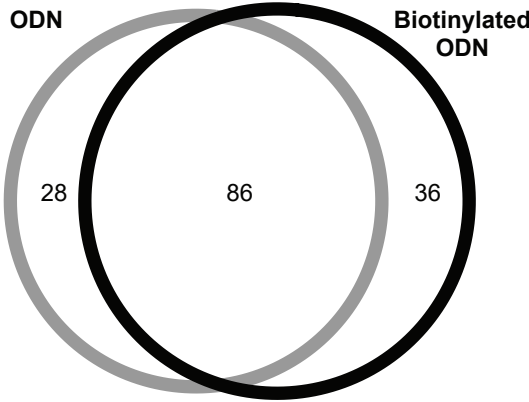

# Wang, Supplemental Figure S3

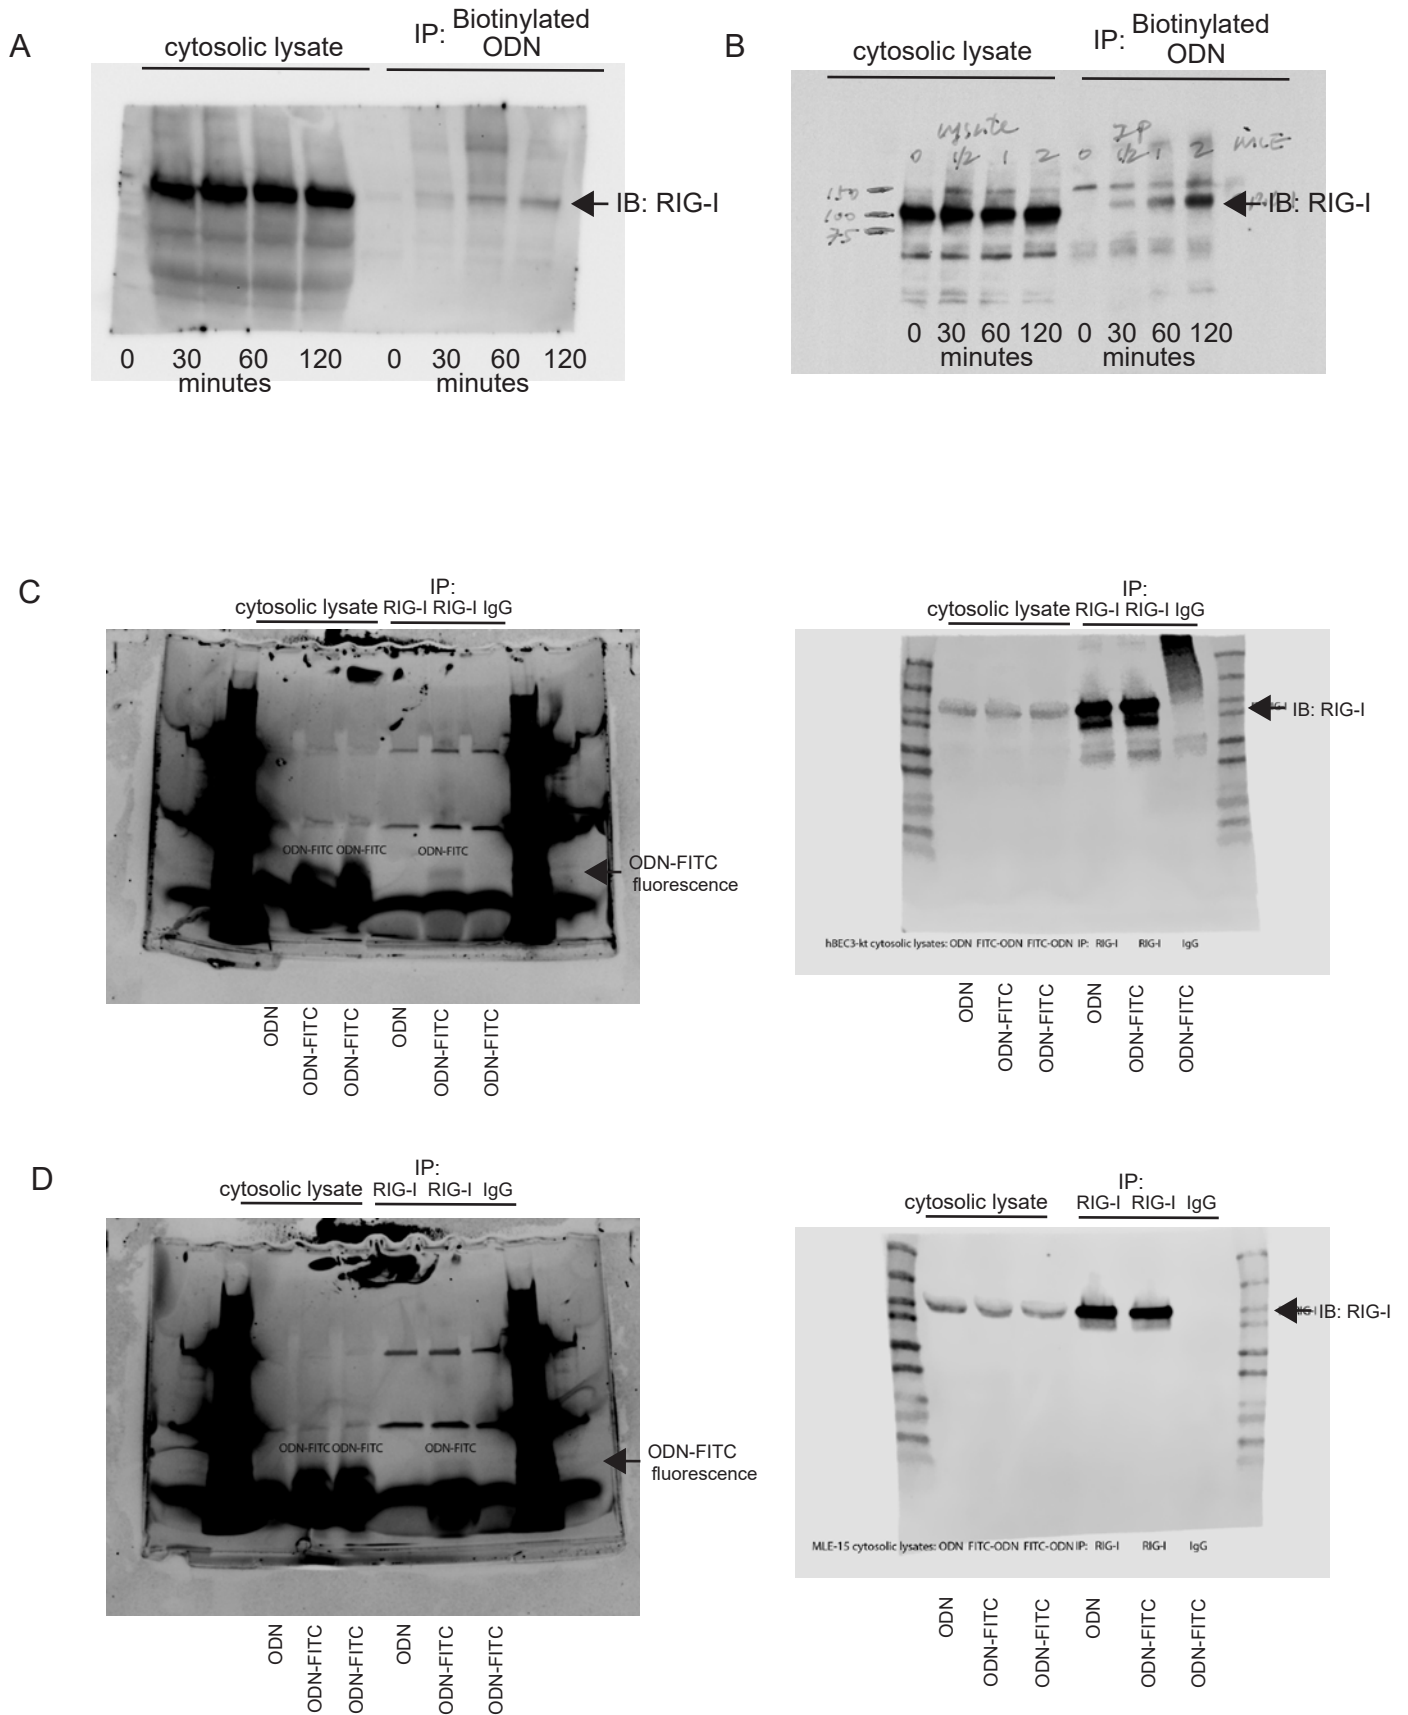

# Wang, Supplemental Figure S4

## A

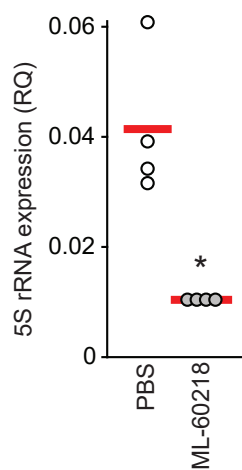

## B

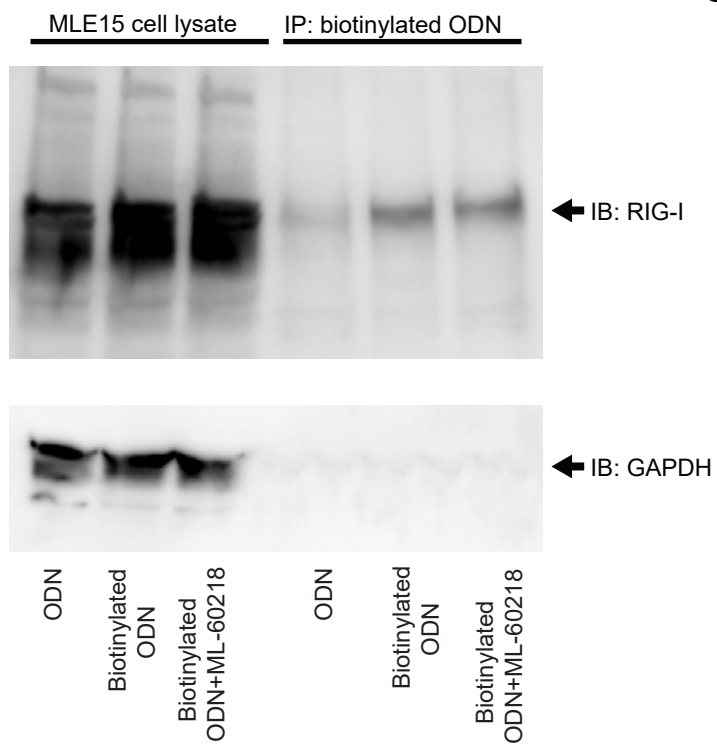

## C

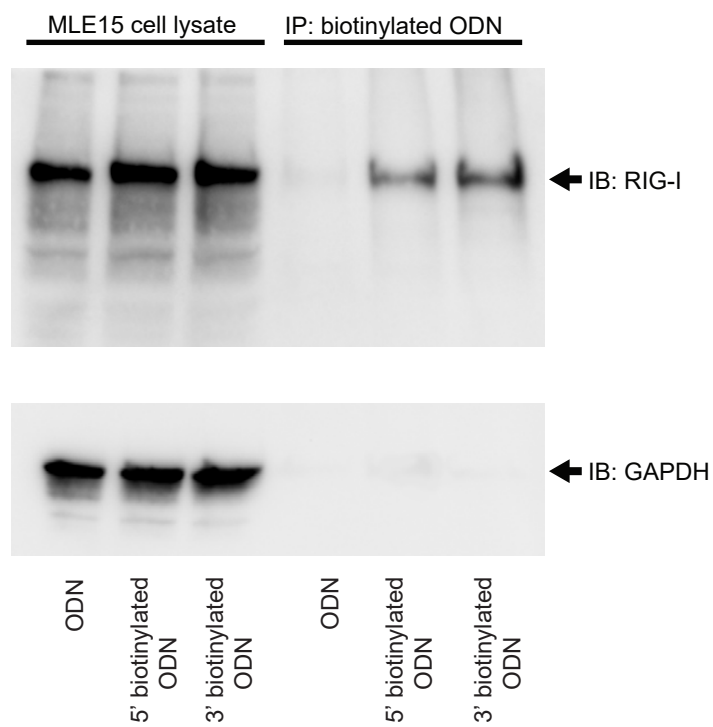

# Wang, Supplemental Figure S5

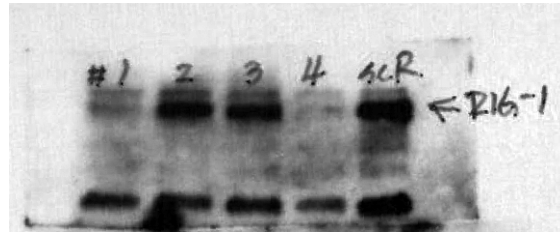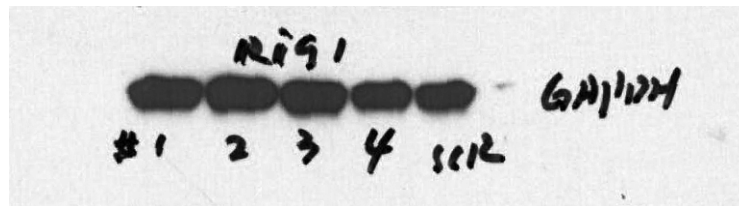

| shRNA:       | Scr |   | RIG1 |   | RIG1 |   |
|--------------|-----|---|------|---|------|---|
| Tet-On RIG1: | -   | - | -    | - | +    | + |
| Doxycycline: | -   | + | -    | + | -    | + |

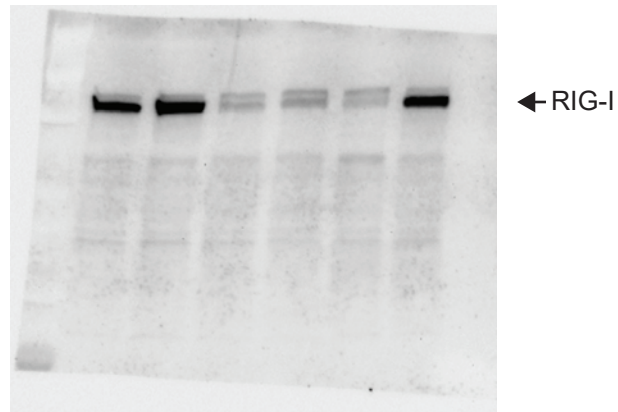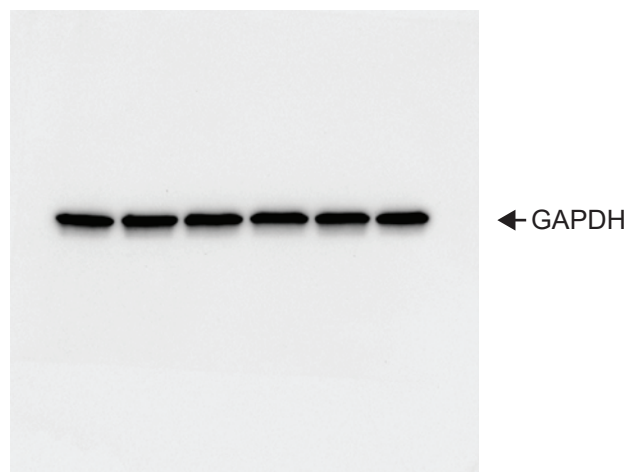



Wang, Supplemental Figure S6

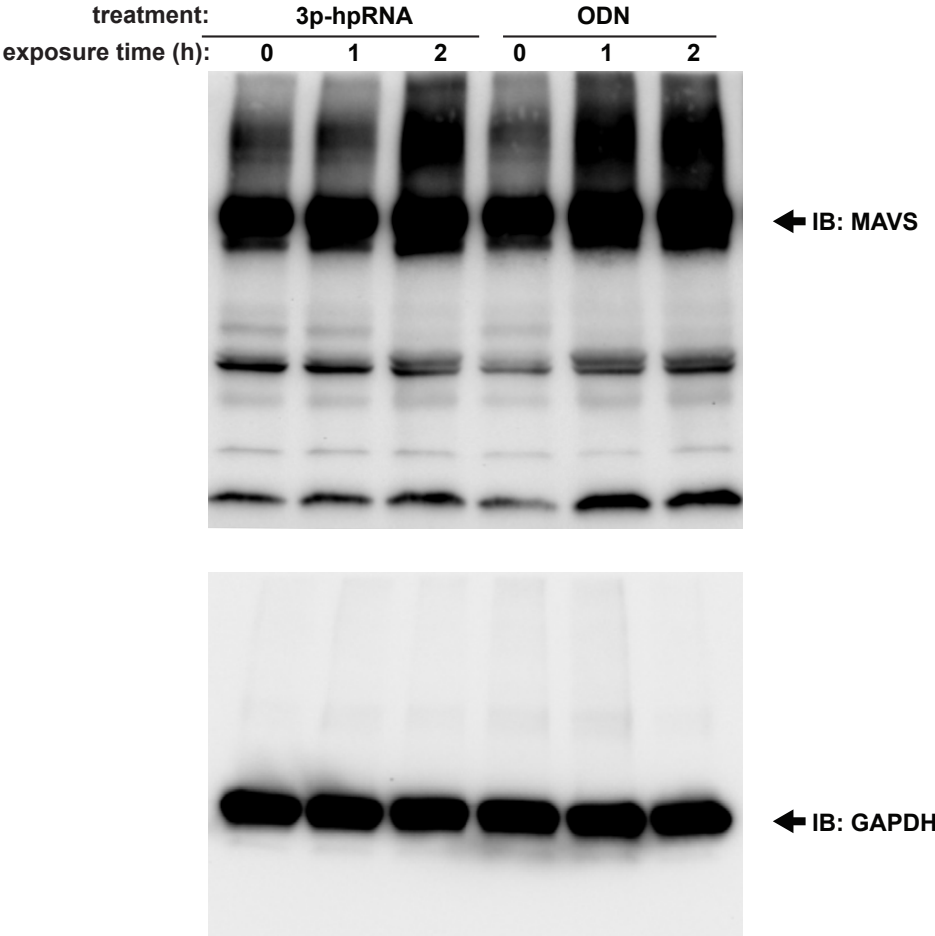

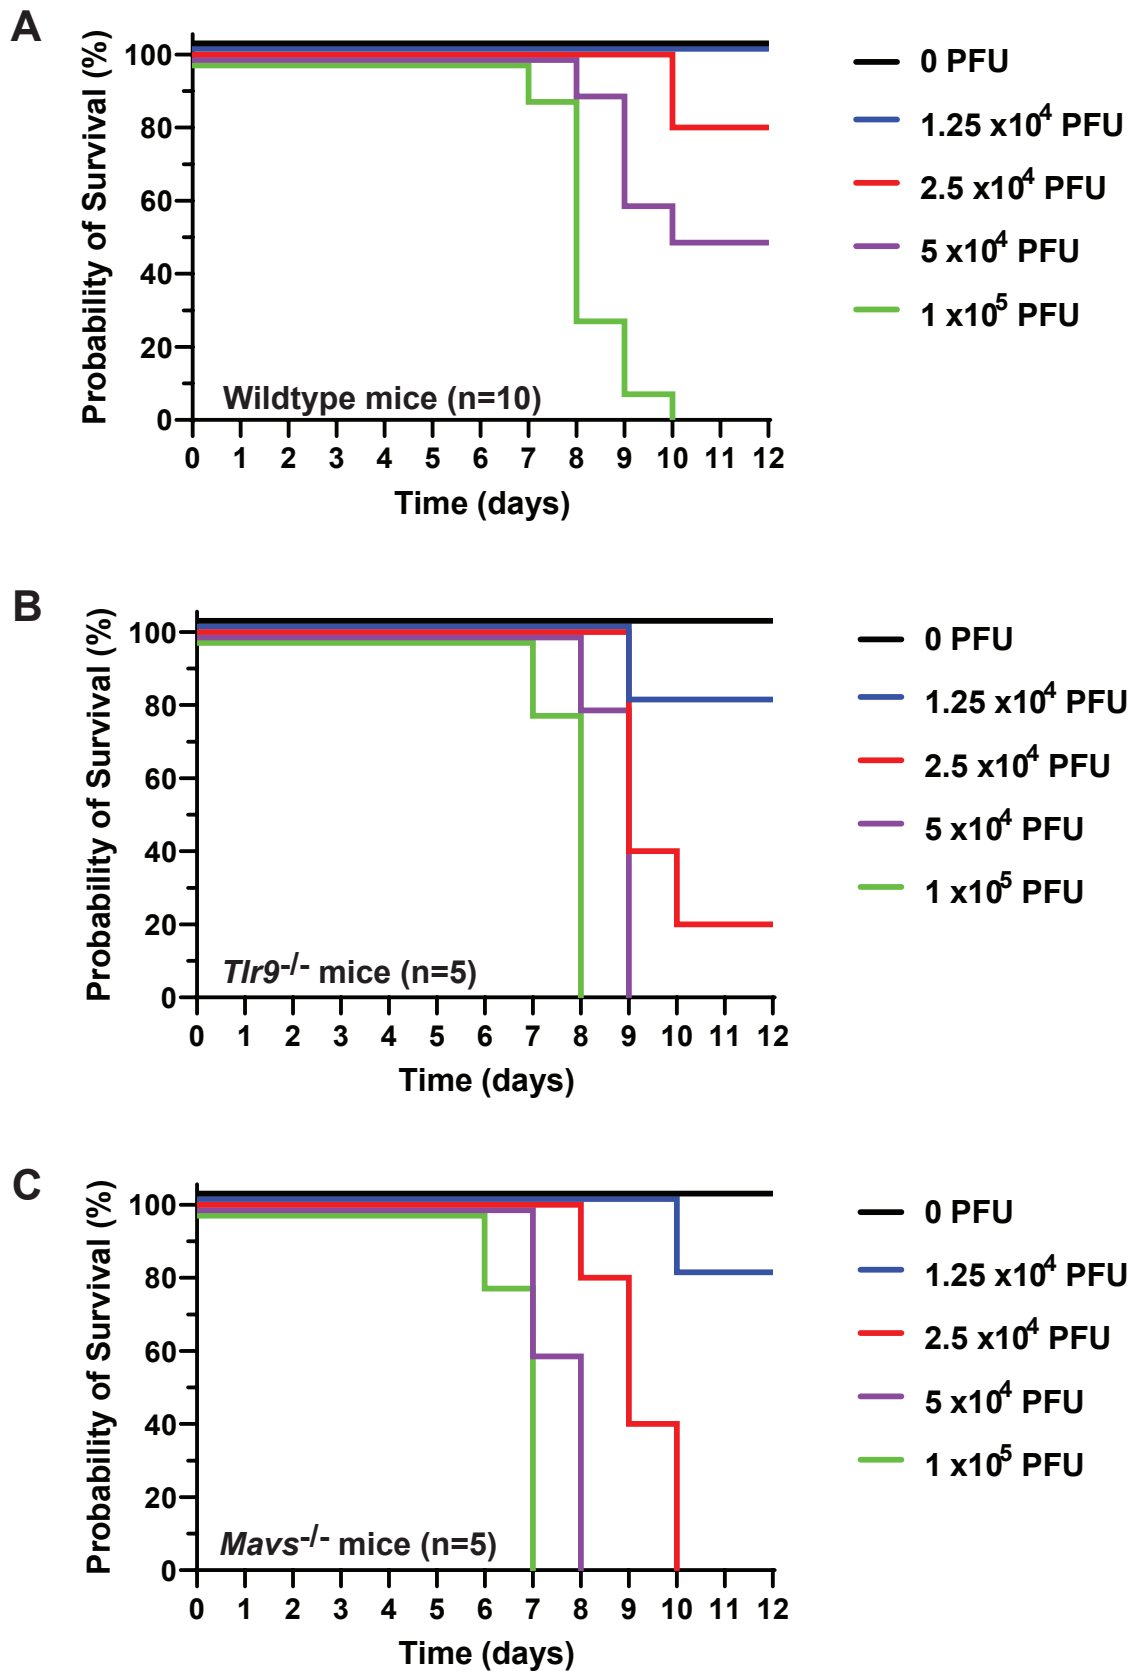

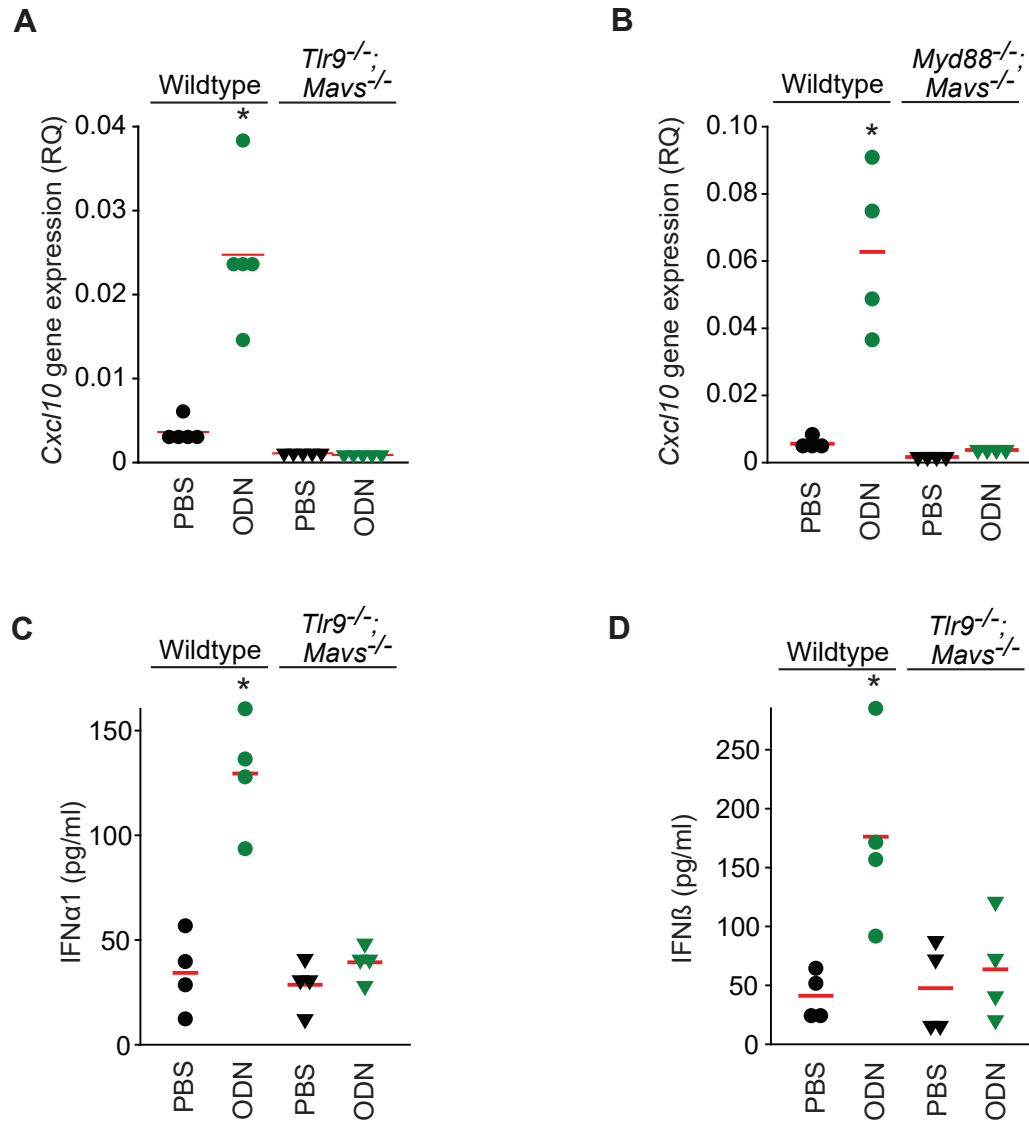

# Wang, Supplemental Figure S9

**A**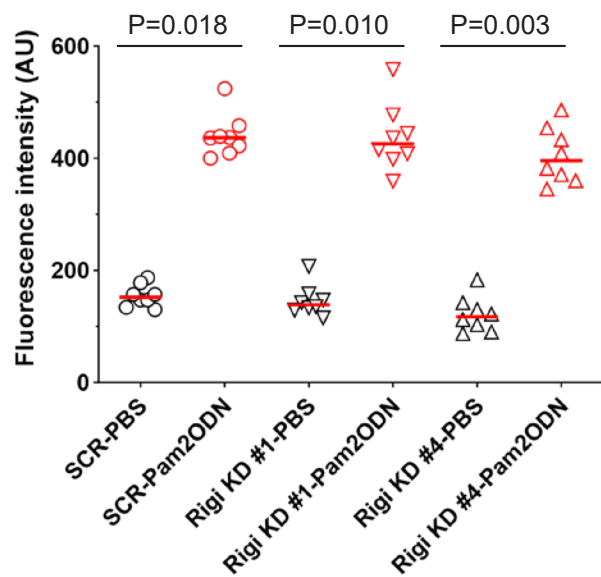**B**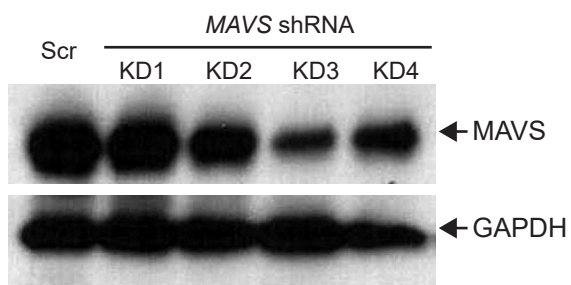**C**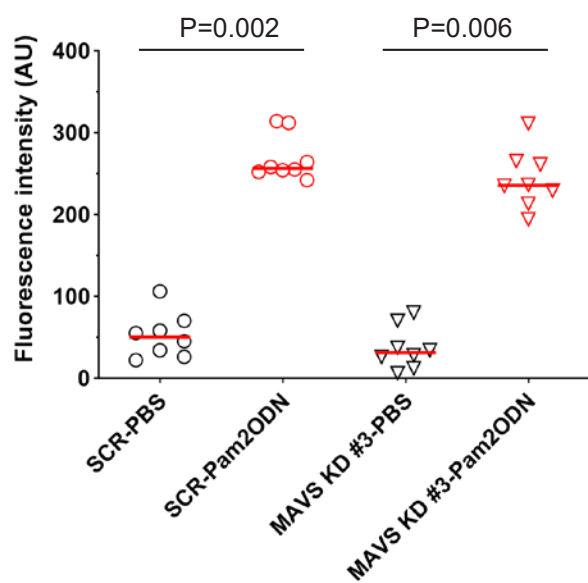

Supplement: jciinsight-9-180584-s153.pdf [file jciinsight-9-180584-s153.pdf]
