# Supplementary material for: The RNA receptor RIG-I binding synthetic oligodeoxynucleotide promotes pneumonia survival
Source: PubMed Central journal article supplement (PMC11601584; doi:10.1172/jci.insight.180584), 2024-11-08

Wang, unedited blot, Figure 2A

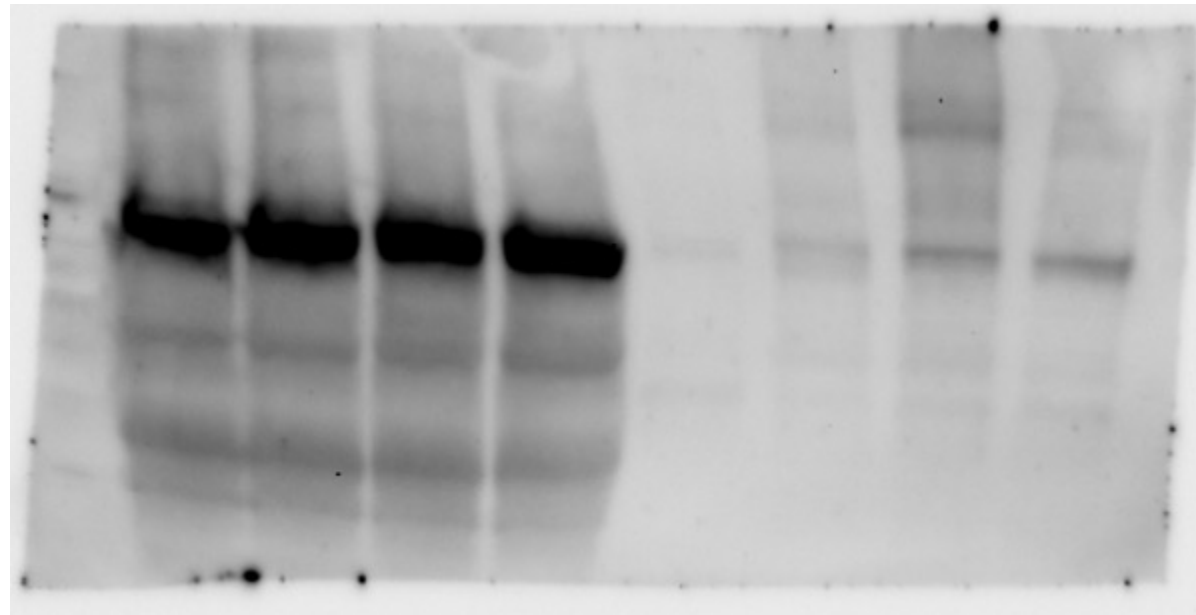

Wang, unedited blot, Figure 2B

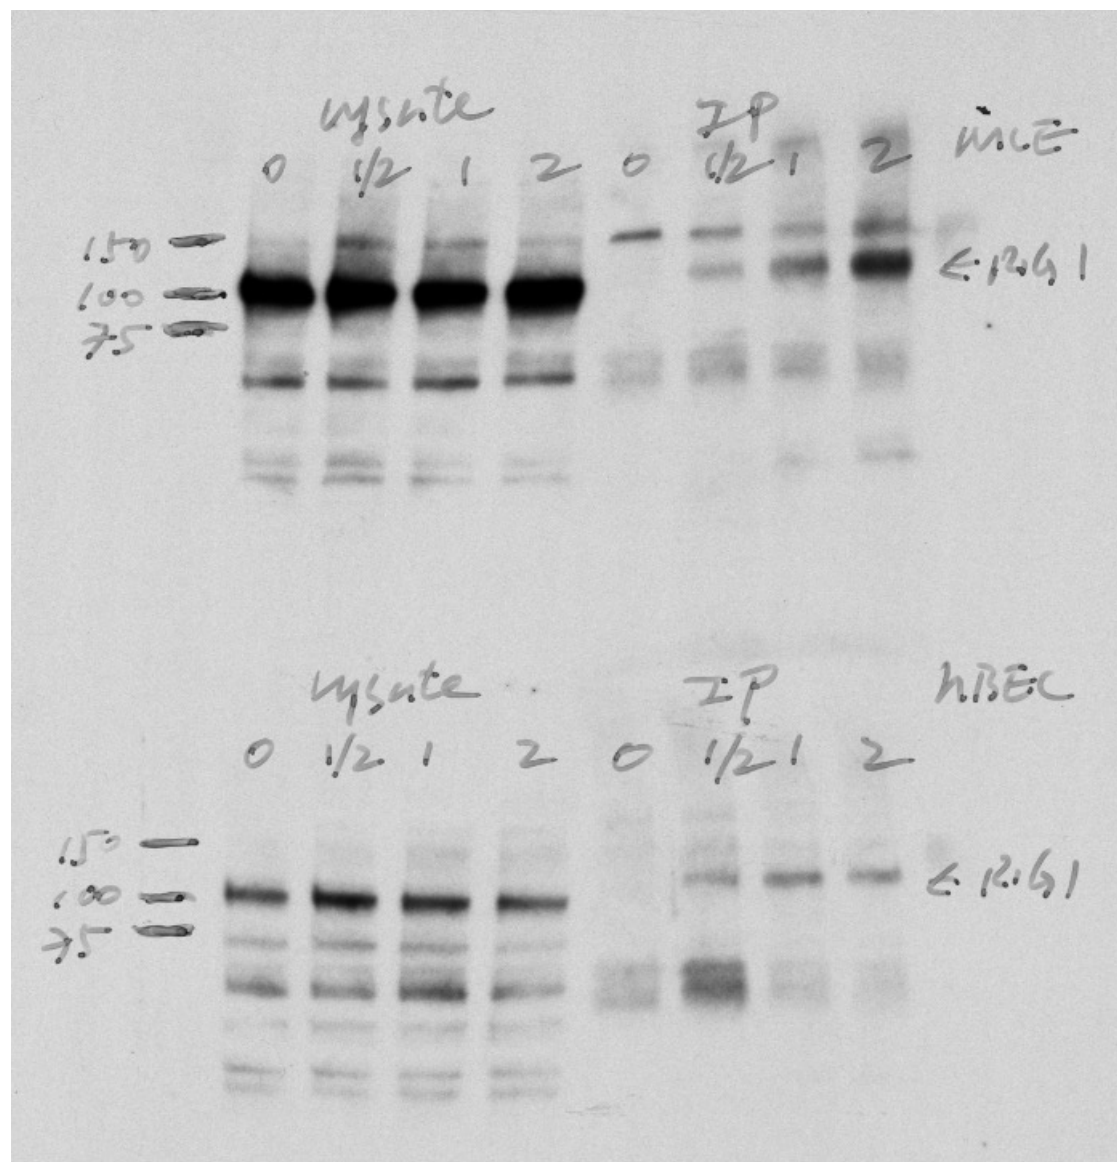

Wang, unedited blot, Figure 2C

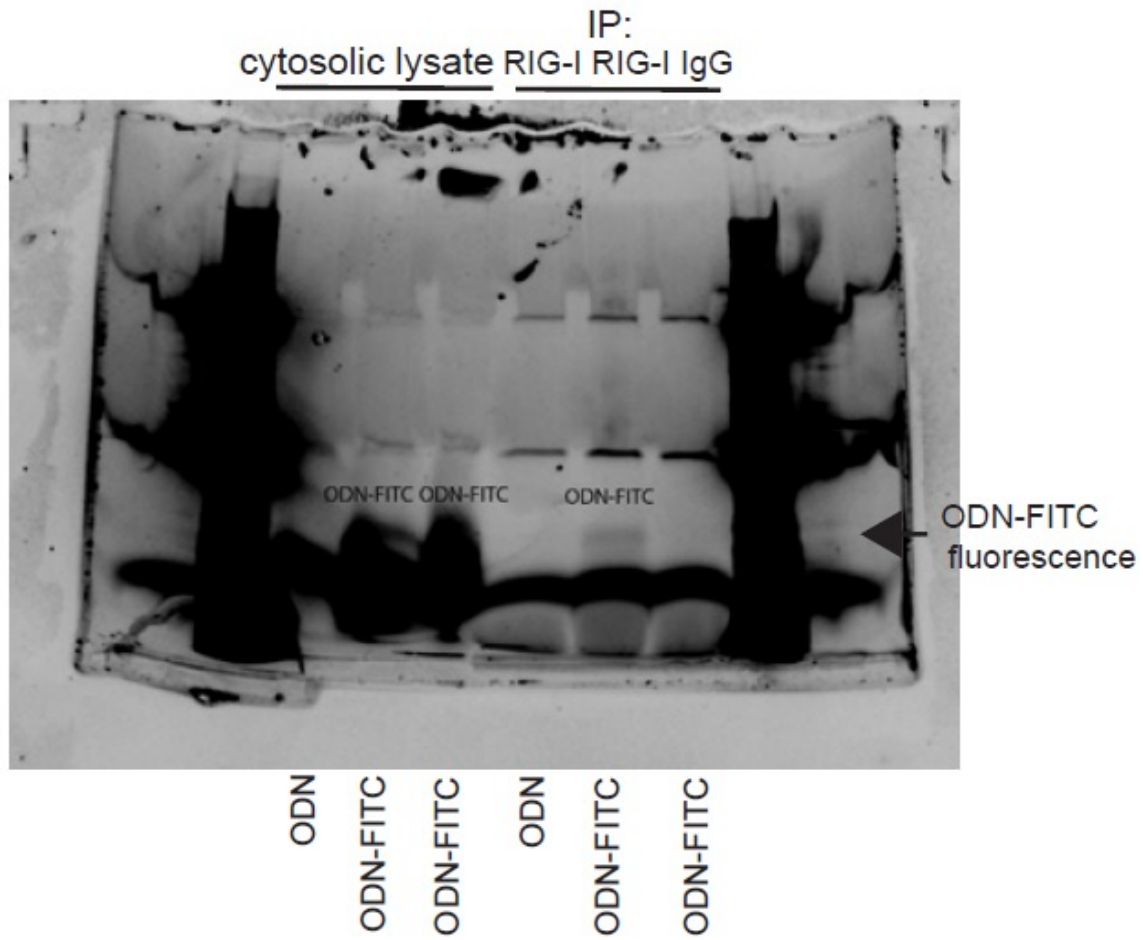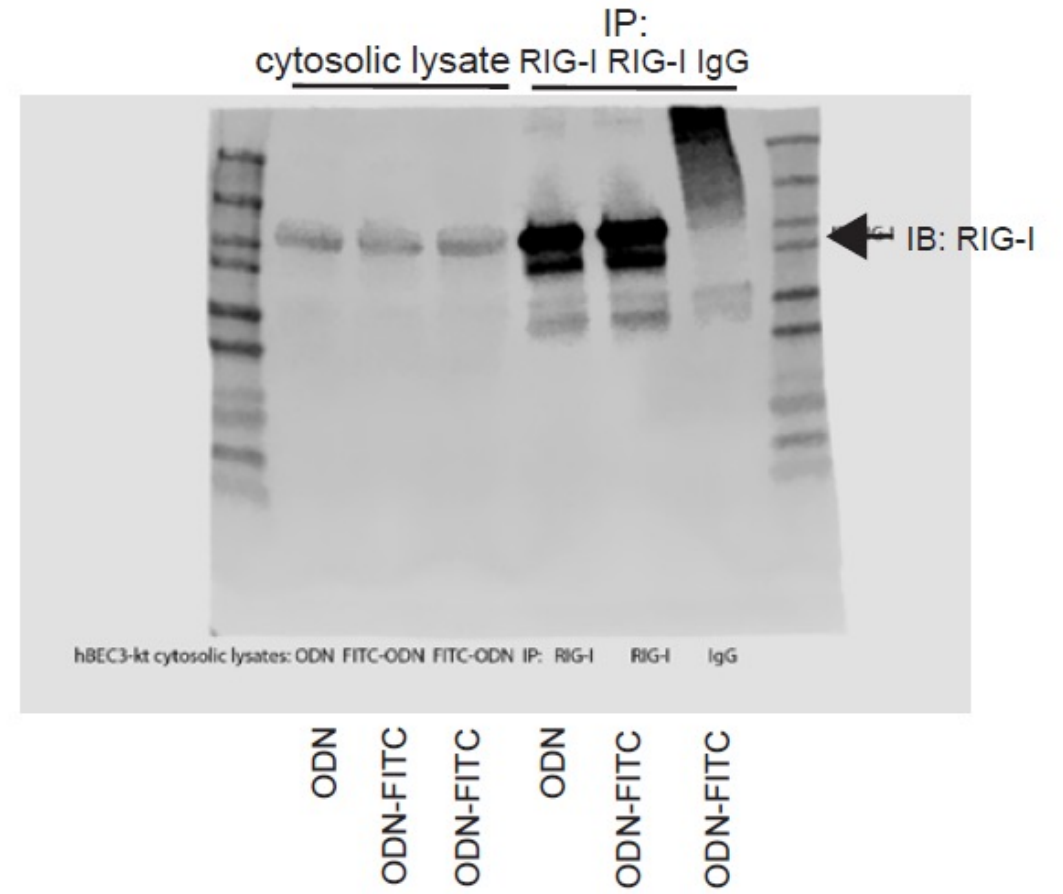

# Wang, unedited blot, Figure 2D

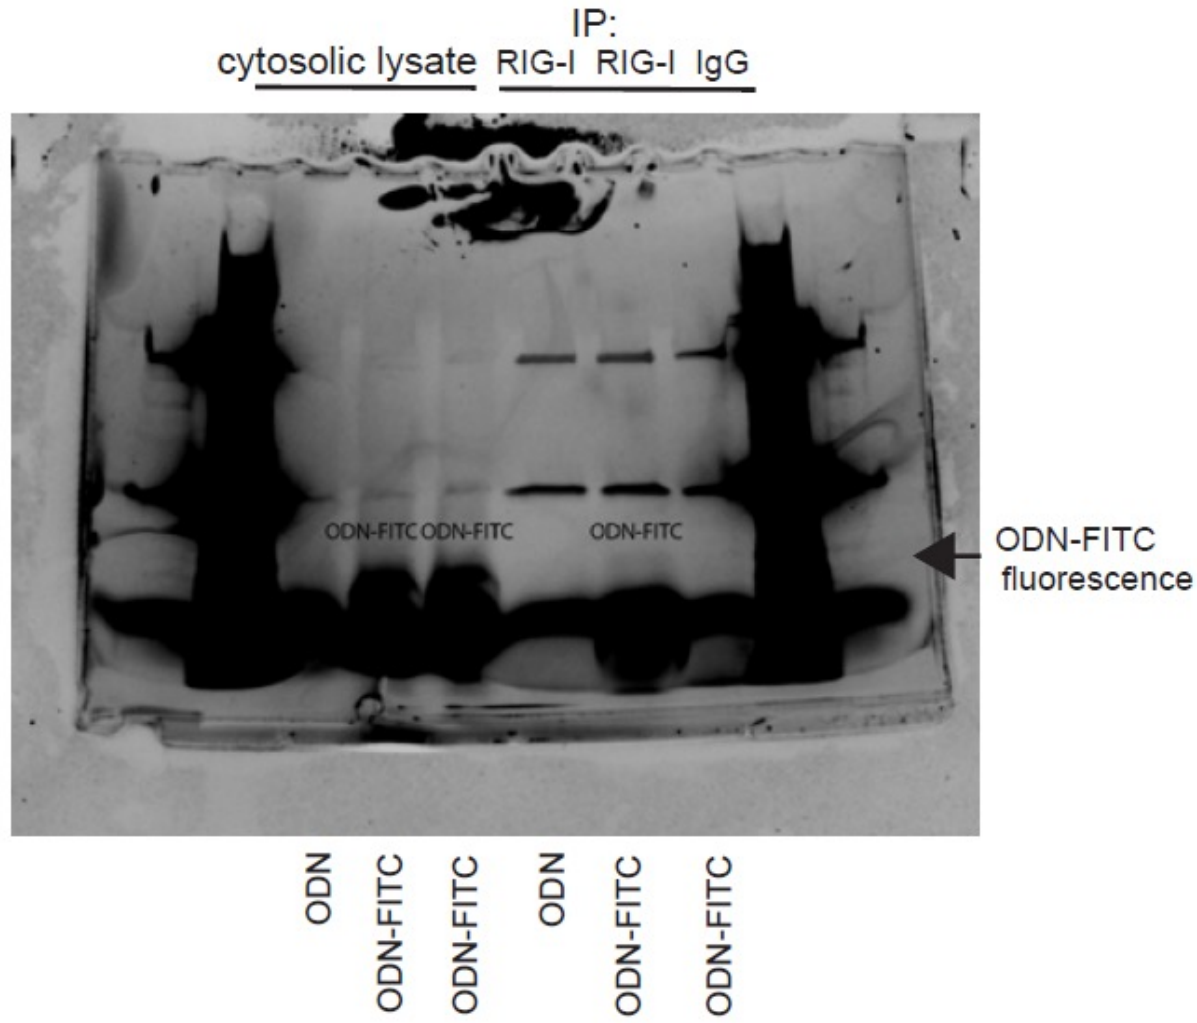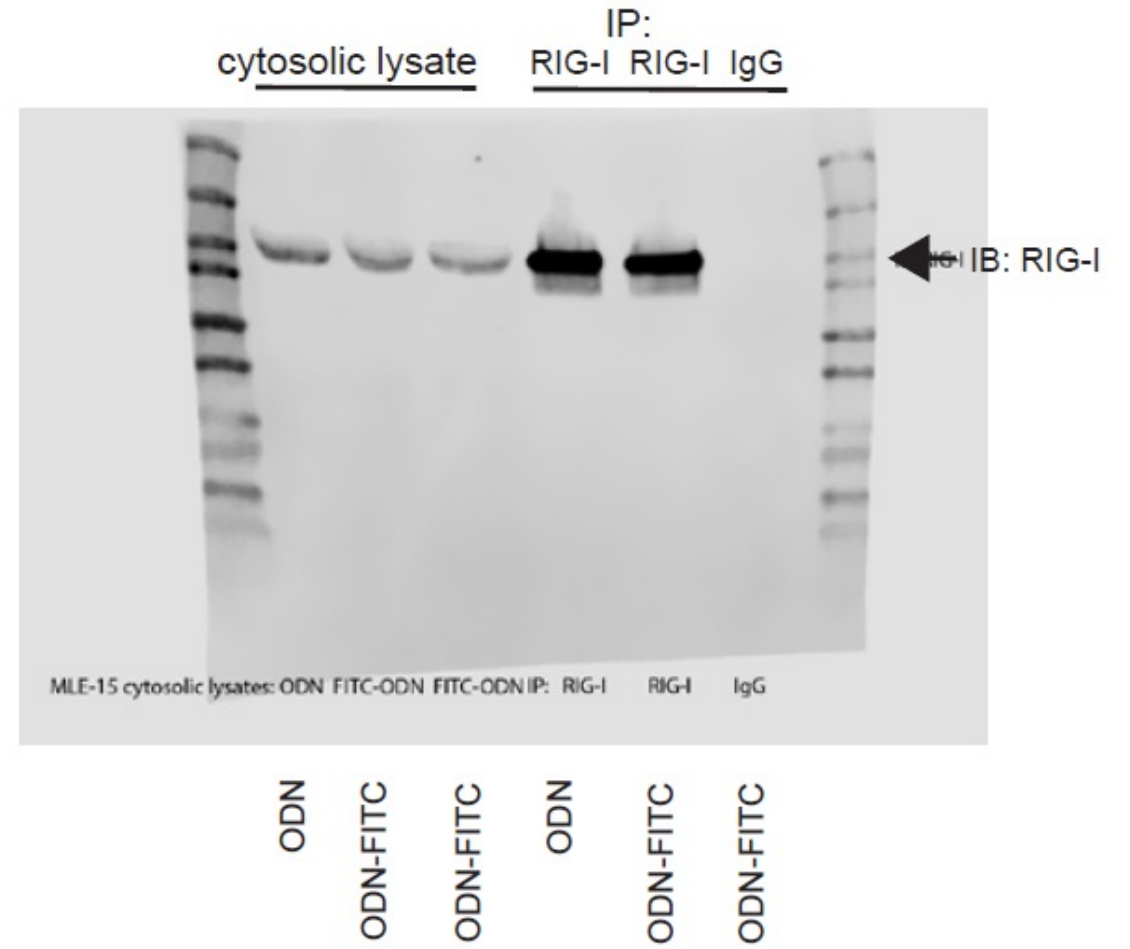

**Wang, unedited blot, Figure 2E**

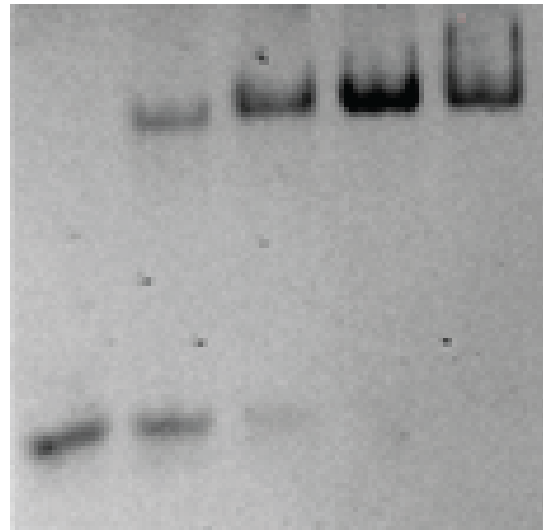

Wang, unedited blot, Figure 4A

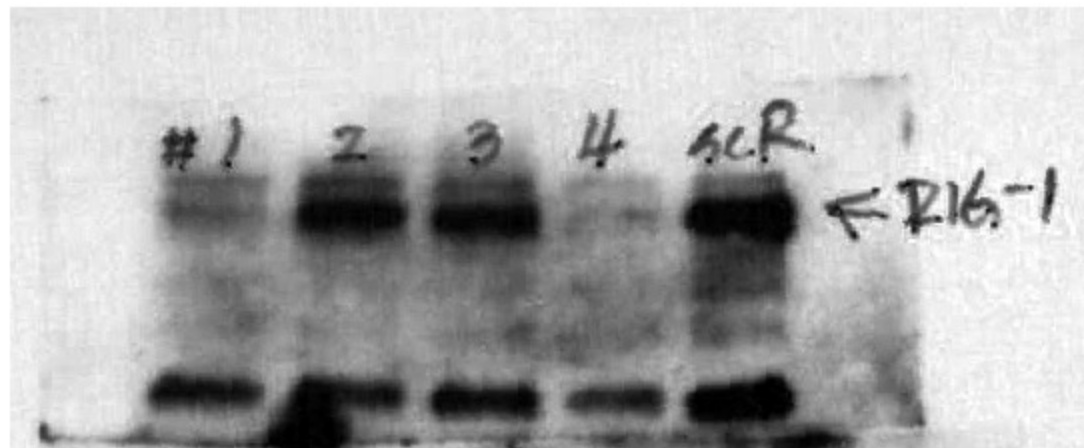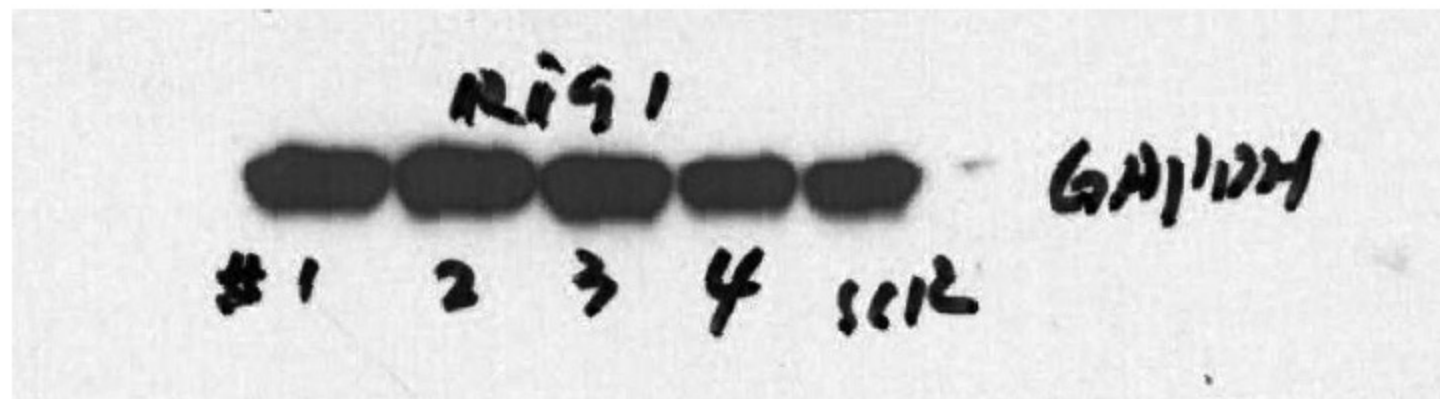

# Wang, unedited blot, Figure 4F

|                      |            |   |             |   |             |   |
|----------------------|------------|---|-------------|---|-------------|---|
| shRNA:               | <u>Scr</u> |   | <u>RIGI</u> |   | <u>RIGI</u> |   |
| Tet-On <i>RIGI</i> : | -          | - | -           | - | +           | + |
| Doxycycline:         | -          | + | -           | + | -           | + |

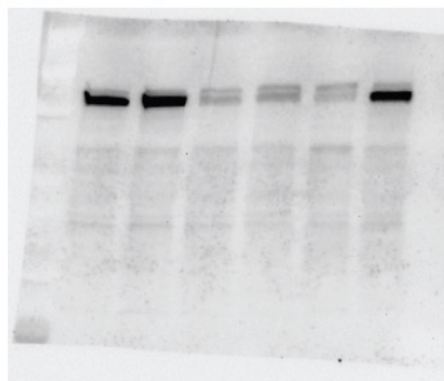

← RIG-I

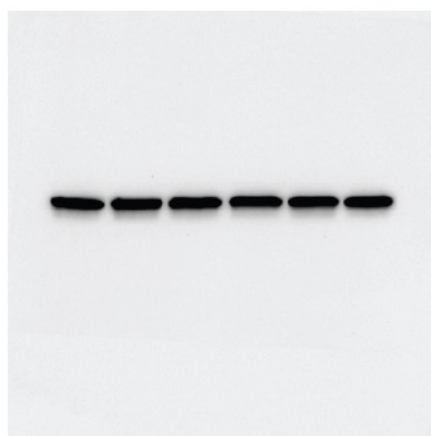

← GAPDH

Wang, unedited blot, Figure S2A

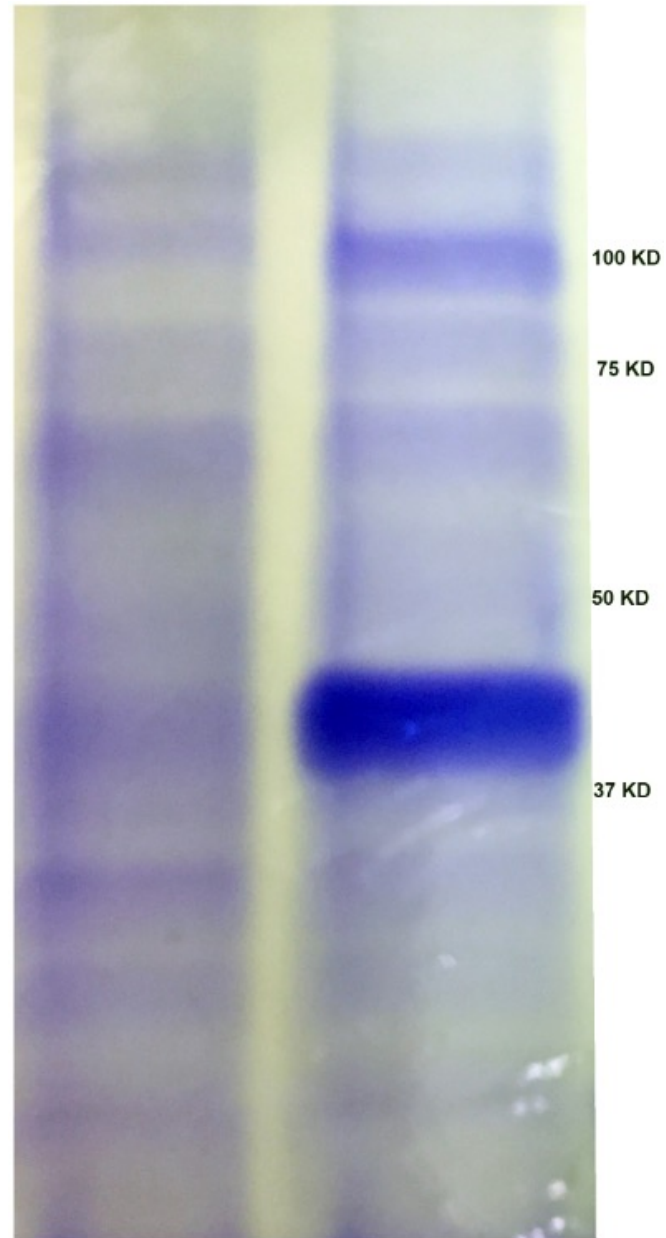



Wang, unedited blot, Figure S3B (GAPDH)

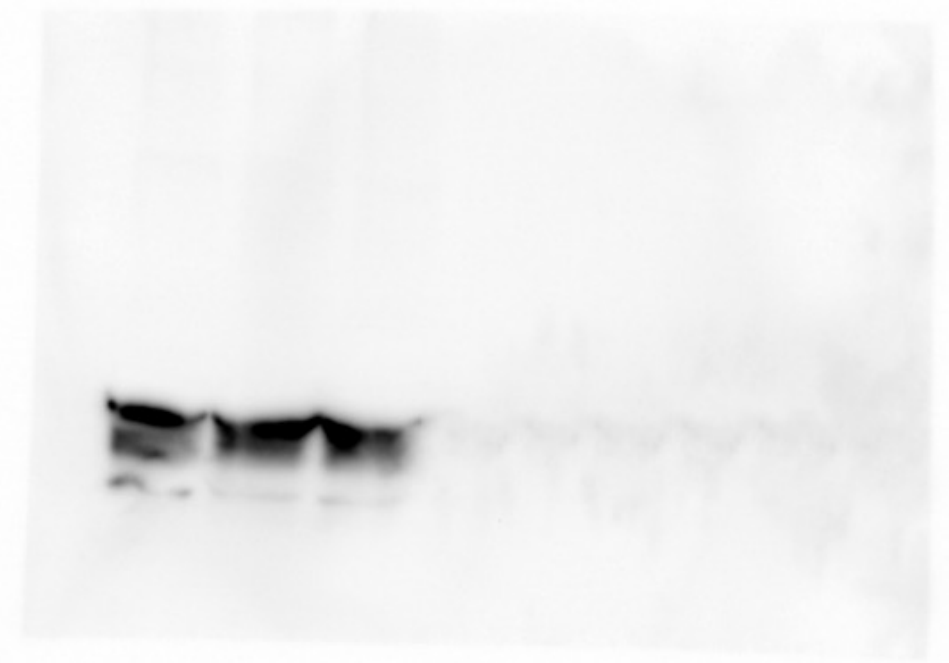

**Wang, unedited blot, Figure S3B (RIG-I)**

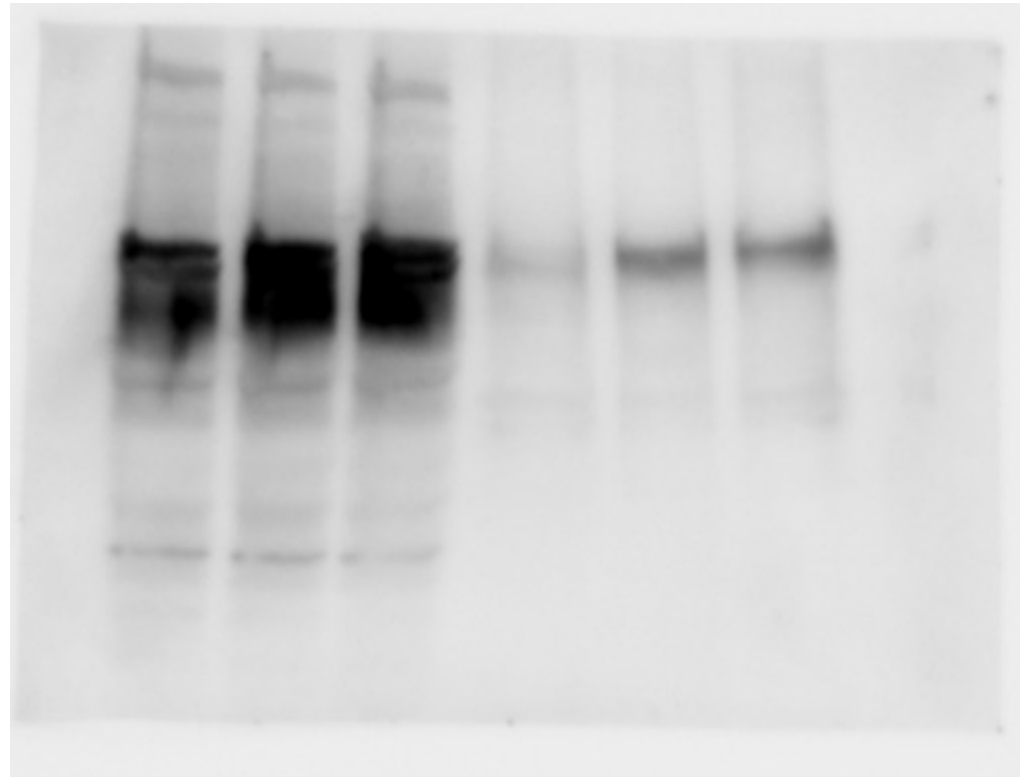

Wang, unedited blot, Figure S3C (GAPDH)

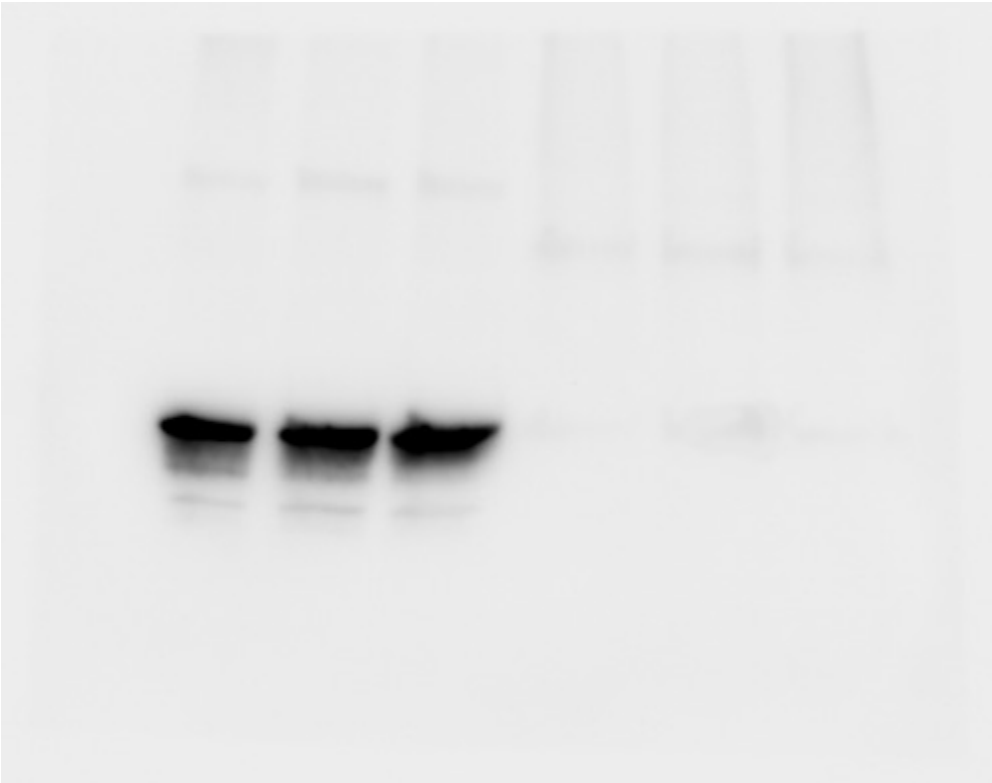

Wang, unedited blot, Figure S3C (RIG-I)

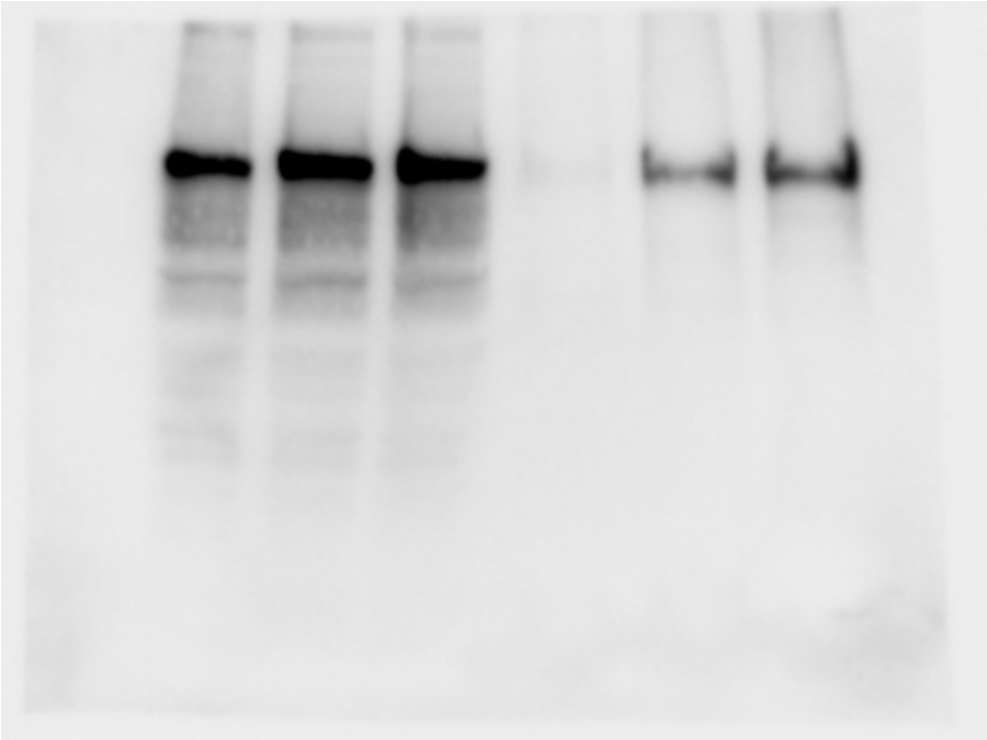

Wang, unedited blot, Figure S4A (GAPDH)

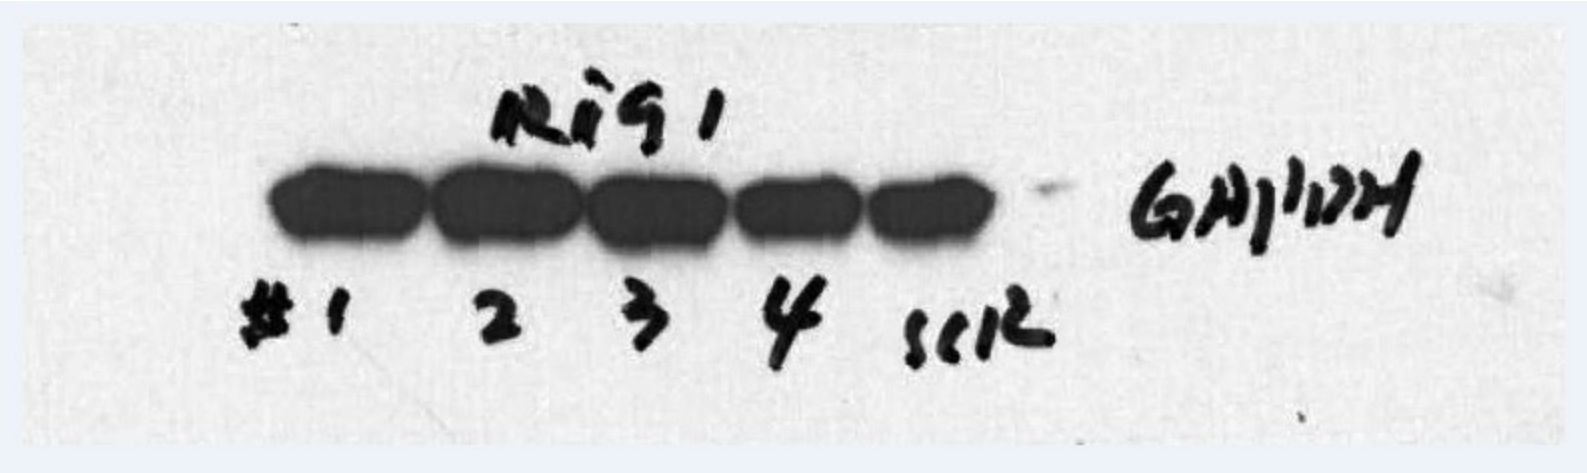

Wang, unedited blot, Figure S4A (RIG-I)

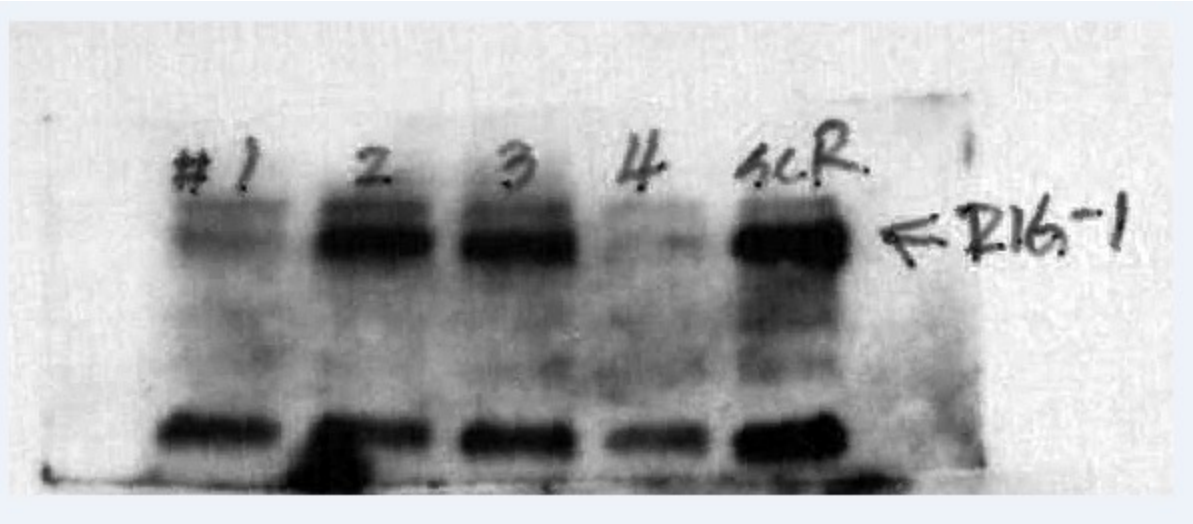

Wang, unedited blot, Figure S6 (GAPDH)

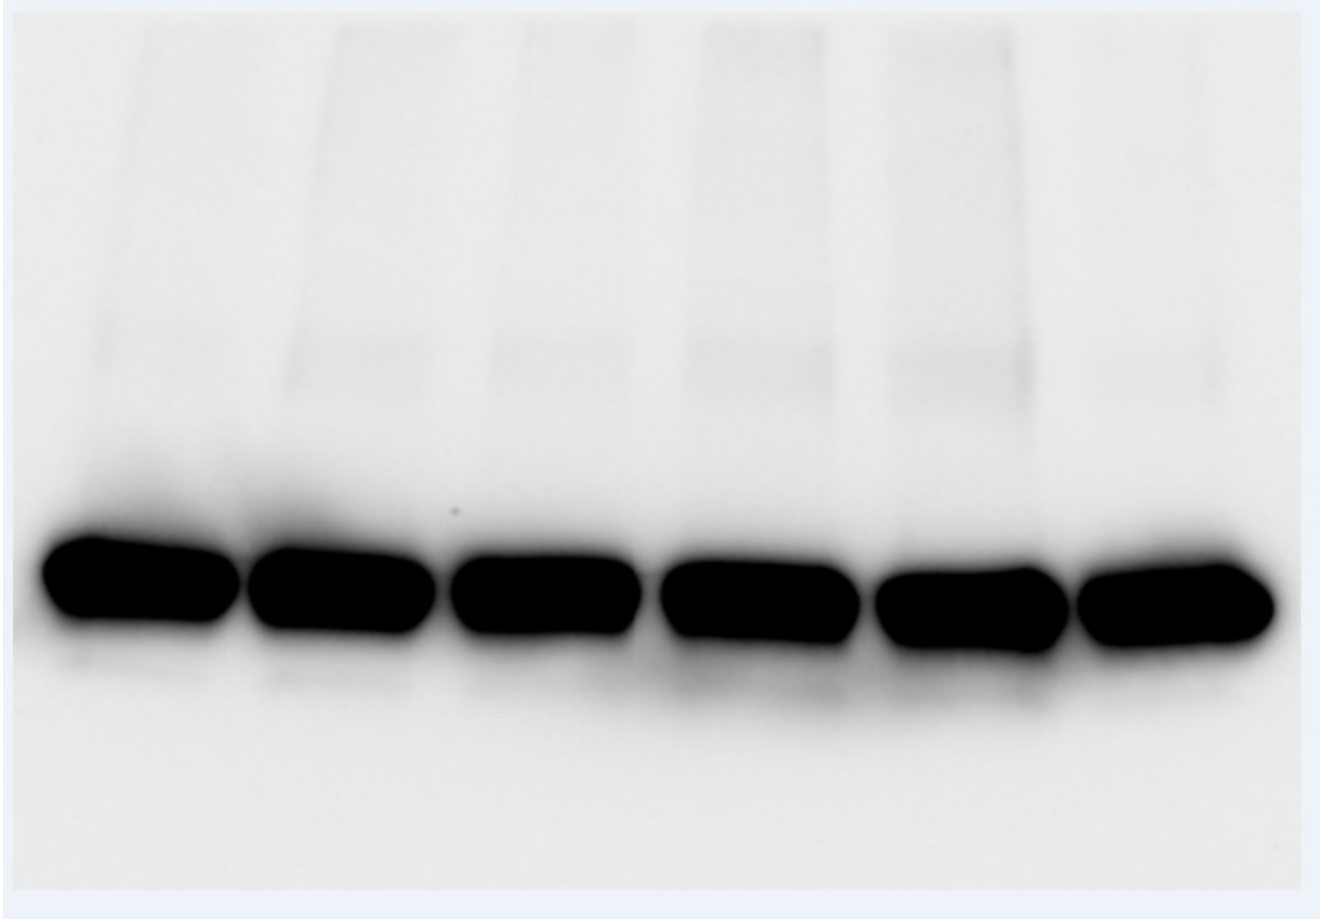

Wang, unedited blot, Figure S6 (MAVS)

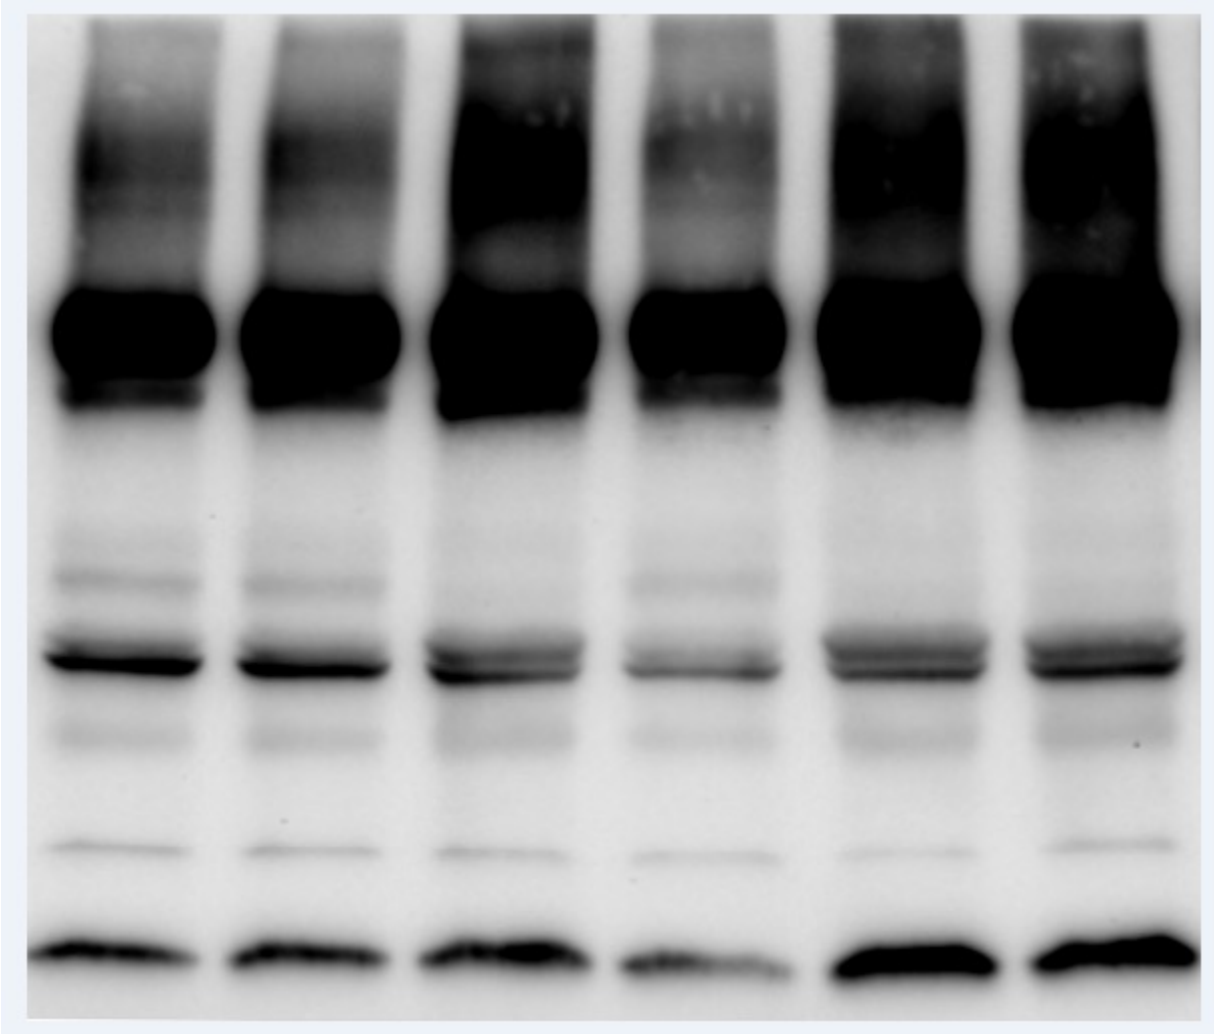



Wang, unedited blot, Figure S9B (GAPDH)

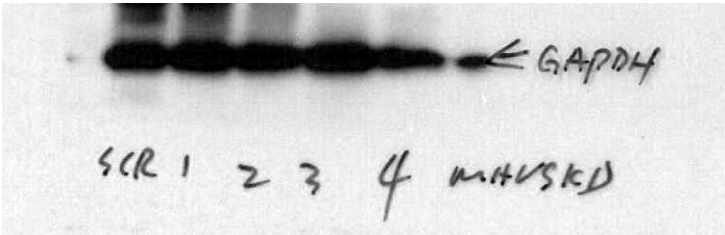

Wang, unedited blot, Figure S9B (MAVS)

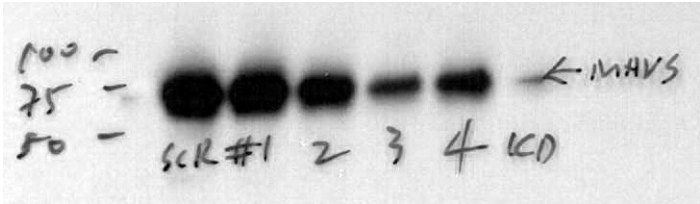

Supplement: jciinsight-9-180584-s154.pdf [file jciinsight-9-180584-s154.pdf]
